# Supplementary material for: Identification and Dynamic Regulation of microRNAs Involved in Salt Stress Responses in Functional Soybean Nodules by High-Throughput Sequencing
Source: Int J Mol Sci. 2013 Jan 28;14(2):2717–38. doi: 10.3390/ijms14022717 (PMC3588011; doi:10.3390/ijms14022717)
Supplement: Supplementary File 2 — Supplementary Table 1 (XLS, 19 KB) [file ijms-14-02717-s002.xls]

## Sheet: Sheet1
	Table S1. Statistics of small RNAs sequences from the soybean nodule NSN and SSN libraries.
		Number of reads	Number of distinct sequences
	NSN library
	Tatal reads	23252859
	Sequences >18 nt	12303456
	Sequences matching Glycine max draft genome	7607757
	Non-coding RNA exact matches removed	4017992	59606
	Known miRNAs (exact match)	1117544	104
	New miRNA candidates With sequenced miRNA	101809	495
	SSN library
	Tatal reads	23794887
	Sequences >18 nt	12608512
	Sequences matching Glycine max draft genome	7667513
	Non-coding RNA exact matches removed	4835029	87993
	Known miRNAs (exact match)	1066263	104
	New miRNA candidates With sequenced miRNA	131714	456
	Note: NSN and SSN represent Non-salt Stressed Nodules and Salt Stressed Nodules, respectively.
