# Supplementary material for: Identification and Dynamic Regulation of microRNAs Involved in Salt Stress Responses in Functional Soybean Nodules by High-Throughput Sequencing
Source: Int J Mol Sci. 2013 Jan 28;14(2):2717–38. doi: 10.3390/ijms14022717 (PMC3588011; doi:10.3390/ijms14022717)
Supplement: Supplementary File 3 — Supplementary Table 2 (XLS, 28 KB) [file ijms-14-02717-s003.xls]

## Sheet: sheet 1
	Table S2. The abundance of known miRNAs under salt stress from Solexa sequencing.
	Name	miRNA Sequence	Read		Ratio
			NSN	SSN
	miR171p	TTGAGCCGCGTCAATATCTTA	12	67	5.58
	gma-miR166a,b	UCGGACCAGGCUUCAUUCCCC	31122	108532	3.49
	gma-miR482	UCUUCCCAAUUCCGCCCAUUCCUA	303	940	3.1
	miR171g,j,u	TGATTGAGCCGTGCCAATATC	15	46	3.07
	gma-miR1520b	GUGACAGUCAUCAUUUAAUAAGA	1	3	3
	gma-miR390a-3p	CGCUAUCCAUCCUGAGUUUC	106	274	2.58
	miR171o	TTGAGCCGTGCCAATATCACA	18	46	2.56
	miR408a,c	CAGGGGAACAGGCAGAGCATG	322	777	2.41
	miR395b,c	CTGAAGTGTTTGGGGGAACTC	54	124	2.3
	gma-miR1510a	UUGUUGUUUUACCUAUUCCACCC	3463	6402	1.85
	gma-miR167c	UGAAGCUGCCAGCAUGAUCUG	23629	42750	1.81
	gma-miR1512a	UAACUGAAAAUUCUUAAAGUAU	5	9	1.8
	gma-miR167e,f	UGAAGCUGCCAGCAUGAUCUU	19557	33965	1.74
	gma-miR167a,b,d	UGAAGCUGCCAGCAUGAUCUA	21623	36346	1.68
	miR171r,s	CGAGCCGAATCAATACCACTC	10462	16671	1.59
	gma-miR168	UCGCUUGGUGCAGGUCGGGAA	10116	16032	1.58
	gma-miR1510b	UGUUGUUUUACCUAUUCCACC	2904	4562	1.57
	gma-miR2107	CAAACCUCCGUAGCCUGUAUC	2	3	1.5
	gma-miR398a,b	UGUGUUCUCAGGUCACCCCUU	235	341	1.45
	gma-miR1515	UCAUUUUGCGUGCAAUGAUCUG	184	266	1.45
	gma-miR172a,b	AGAAUCUUGAUGAUGCUGCAU	7257	9826	1.35
	gma-miR390a-5p	AAGCUCAGGAGGGAUAGCGCC	1494	2004	1.34
	gma-miR171b	CGAGCCGAAUCAAUAUCACUC	4824	6343	1.31
	gma-miR1507a,b	UCUCAUUCCAUACAUCGUCUGA	133760	173975	1.3
	gma-miR1513	UGAGAGAAAGCCAUGACUUAC	49	63	1.29
	gma-miR396b,c	UUCCACAGCUUUCUUGAACUU	1748	2217	1.27
	gma-miR390b	AAGCUCAGGAGGGAUAGCACC	17	21	1.24
	miR156r	CTGACAGAAGATAGAGAGCAT	4175	5152	1.23
	gma-miR396a	UUCCACAGCUUUCUUGAACUG	3197	3810	1.19
	gma-miR1535	CUUGUUUGUGGUGAUGUCU	315	370	1.17
	gma-miR164	UGGAGAAGCAGGGCACGUGCA	1112	1271	1.14
	gma-miR162	UCGAUAAACCUCUGCAUCCA	944	1076	1.14
	miR156q,s	TGACAGAAGAGAGTGAGCACT	291	328	1.13
	gma-miR159c	AUUGGAGUGAAGGGAGCUCCG	335	21	0.06
	gma-miR159b	AUUGGAGUGAAGGGAGCUCCA	158	11	0.07
	gma-miR169c	AAGCCAAGGAUGACUUGCCGA	68	5	0.07
	gma-miR319a,b	UUGGACUGAAGGGAGCUCCC	20	2	0.1
	miR5559	TACTTGGTGAATTGTTGGATC	489	97	0.2
	gma-miR1517	AGUCUUGGUCAAUGUCGUUCGAAA	9	2	0.22
	gma-miR1520c	UUCAAUAAGAACGUGACACGUGA	21	7	0.33
	gma-miR160	UGCCUGGCUCCCUGUAUGCCA	459	180	0.39
	gma-miR169b	CAGCCAAGGAUGACUUGCCGA	34	15	0.44
	gma-miR1523	AUGGGAUAAAUGUGAGCUCA	37	17	0.46
	miR4416b	TGGGTGAGAGAAACGCGTATC	145	69	0.48
	gma-miR1521	CUGUUAAUGGAAAAUGUUGA	2	1	0.5
	gma-miR1519	UAAGUGUUGCAAAAUAGUCAUU	2	1	0.5
	gma-miR159a	UUUGGAUUGAAGGGAGCUCUA	10096	5225	0.52
	miR4387e	UGUUAGUGAUAAGGCGUGAUG	290	156	0.54
	miR1512c	UAACUGAACAUUCUUAGAGCAU	10778	5839	0.54
	gma-miR2119	UCAAAGGGAGUUGUAGGGGAA	778	431	0.55
	gma-miR156c,d,e	UUGACAGAAGAUAGAGAGCAC	393772	228818	0.58
	gma-miR1511	AACCAGGCUCUGAUACCAUG	28100	16661	0.59
	gma-miR1514b	UUCAUUUUUAAAAUAGACAUU	21	13	0.62
	gma-miR1518	UGUGUUGUAAAGUGAAUAUCA	16	10	0.63
	gma-miR169a	CAGCCAAGGAUGACUUGCCGG	22	14	0.64
	gma-miR1536	AAGCAGAGACAAAUGUGUUUA	36	23	0.64
	gma-miR2109	UGCGAGUGUCUUCGCCUCUG	7974	5240	0.66
	miR5667	AAACAGAUCUAAAUGGAUUCC	24	16	0.67
	gma-miR1520d	AUCAGAACAUGACACGUGACAA	442	329	0.74
	gma-miR1514a	UUCAUUUUUAAAAUAGGCAUU	685	512	0.75
	miR5770a	TTAGGACTATGGTTTGGACGA	2549	1907	0.75
	gma-miR156a	UGACAGAAGAGAGUGAGCAC	204878	160598	0.78
	gma-miR1520a	UAGAACAUGAUACAUGACAGUCA	14	11	0.79
	gma-miR393	UCCAAAGGGAUCGCAUUGAUC	148	118	0.8
	miR5671	CAUGGAAGUGAAUCGGGUGAC	301	258	0.86
	gma-miR1508a	UCUAGAAAGGGAAAUAGCAGUUG	998	872	0.87
	miR172i,l	GGAATCTTGATGATGCTGCAT	1086	947	0.87
	miR393i	TTCCAAAGGGATCGCATTGATC	263	234	0.89
	gma-miR1509b	UUAAUCAAGGAAAUCACGGUU	62260	59096	0.95
	gma-miR172d,e	GGAAUCUUGAUGAUGCUGCAGCAG	5291	5034	0.95
	gma-miR172c	GGAAUCUUGAUGAUGCUGCAG	5291	5034	0.95
	gma-miR156b	UGACAGAAGAGAGAGAGCACA	258	249	0.97
	gma-miR1509a	UUAAUCAAGGAAAUCACGGUCG	127333	126294	0.99
	gma-miR171a	UGAGCCGUGCCAAUAUCACGA	5	5	1
	gma-miR1527	UAACUCAACCUUACAAAACC	5	5	1
	gma-miR2108a	UUAAUGUGUUGUGUUUGUCGG	3	3	1
	gma-miR2108b	UUAAUGUGUUGUGUUUGUGAG	1	1	1
	gma-miR1529	UUAAAGGAAACAAUUAAUCGUUA	1	1	1
	miR397b-3p	TATTGACGCTGCACTCAATCA	16839	16786	1
	miR169t	TAGCCAAGGATGGACTTGCCTA	157	0
	miR5037c	AGTGGAACTTTGAGGCCTGC	56	0
	miR5036	AGAGGCCCUUGGGGAGGAGUA	34	0
	miR169s	AAGCCAAGGATGACTTGCCGG	26	0
	gma-miR1532	AACACGCUAAGCGAGAGGAGCUC	3	0
	gma-miR1528	AUAGAUUAGAUCAAUAUAUUAGU	1	0
	miR2111b,c,f	TAATCTGCATCCTGAGGTTT	0	187
	miR172h,j	GCAGCAGCATCAAGATTCACA	0	32
	gma-miR1516	CAAAAGAGCUUAUGGCUUGUA	0	3
