# Supplementary material for: Identification and Dynamic Regulation of microRNAs Involved in Salt Stress Responses in Functional Soybean Nodules by High-Throughput Sequencing
Source: Int J Mol Sci. 2013 Jan 28;14(2):2717–38. doi: 10.3390/ijms14022717 (PMC3588011; doi:10.3390/ijms14022717)
Supplement: Supplementary File 4 — Supplementary Table 3 (XLS, 34 KB) [file ijms-14-02717-s004.xls]

## Sheet: sheet1
	Table S3. The novel miRNAs detected in both NSN and SSN libraries, their pre-miRNA location and abundance.
	Name	miRNA sequence (5'-3')	Arm	pre-miRNA location	MFE	Reads		Ratio
						NSN	SSN
	miR4416d	ACGGGTCGCTCTCACCTGGAG	3'	Gm02:30498955:30499126:-	-65.3	12	79	6.58
	gly_1	GGGCTCCTCTCTCCTGGCATG	5'	Gm20:38248017:38248148:-	-61.2	50	285	5.7
	gly_2	AGCCGCGTCAATATCTTATTT	3'	Gm12:35489086:35489194:+	-41.9	12	66	5.5
	miR399i	CGCCAAAGAAGATTTGCCCGG	3'	Gm08:9112036:9112142:-	-31.4	9	41	4.56
	gly_3	TTAGCTTCTTTCACCTTTCCC	3'	Gm17:14170511:14170612:-	-55	12	53	4.42
	miR399j	TGCCAAAGGAGAGCTGCCCTG	3'	Gm09:34174615:34174748:+	-54.8	376	1236	3.29
	miR399k	TGCCAAAGGAGAGCTGCCCTG	3'	Gm16:35606655:35606782:+	-55.8	376	1236	3.29
	gly_4	GAGCTCTCAGCACTCCAGTGT	5'	Gm07:5393976:5394157:-	-82.5	9	28	3.11
	gly_5a	TATAAATAGGACCAGAGGTAG	3'	Gm10:893455:893562:+	-47.1	10	31	3.1
	gly_5b	TATAAATAGGACCAGAGGTAG	3'	Gm13:37718475:37718554:+	-35.1	10	31	3.1
	gly_6	TGGTGATCATTAGGACAATAT	5'	Gm16:2804159:2804348:-	-64	81	239	2.95
	miR4416c	ATACGGGTCGCTCTCACCTAGG	3'	Gm19:40699070:40699221:-	-67.5	637	1881	2.95
	miR156aa	CTGACAGAAGATAGAGAGCAC	5'	Gm18:61442586:61442692:-	-43.9	20706	34689	1.68
	gly_7	TGTTGGACGGTTCAATCAAA	5'	Gm05:41564645:41564756:+	-42.4	115	192	1.67
	miR482f	GGAATGGGCTGATTGGGAAGT	5'	Gm18:61452908:61452997:-	-41	1497	2228	1.49
	gly_8	TATGAACCATACGGATTGTCA	3'	Gm05:30104428:30104503:-	-32.6	11	16	1.46
	miR164l	TGGAGAAGCAGGGCACATGCT	5'	Gm07:3508921:3509000:+	-45.8	25	36	1.44
	gly_9	CAACCCGTCTTAGAATGAGCA	5'	Gm15:20061038:20061157:-	-65.1	44	62	1.41
	gly_10	AGAGCCATTCTGAAAGATCCTA	3'	Gm13:32275832:32275962:-	-60.2	15	20	1.33
	gly_11a	TTATCAGTAGCATCATCATCA	5'	Gm14:13819007:13819089:+	-42.7	165	215	1.3
	gly_11b	TTATCAGTAGCATCATCATCA	5'	Gm07:10004527:10004609:+	-40.6	165	215	1.3
	gly_11c	TTATCAGTAGCATCATCATCA	5'	Gm07:10001915:10001997:+	-41.1	165	215	1.3
	gly_12	TTAAAGTATAGGGACCAAATT	3'	Gm19:37100978:37101075:+	-26.4	18	21	1.17
	gly_13a	CTTAAATGGATTGGATCTTGA	5'	Gm19:3610433:3610530:+	-42	72	80	1.11
	gly_13b	CTTAAATGGATTGGATCTTGA	5'	Gm17:32044297:32044393:-	-39.9	72	80	1.11
	gly_13c	CTTAAATGGATTGGATCTTGA	5'	Gm15:43239794:43239891:+	-44.2	72	80	1.11
	gly_13d	CTTAAATGGATTGGATCTTGA	5'	Gm14:27129224:27129321:+	-42.6	72	80	1.11
	gly_13e	CTTAAATGGATTGGATCTTGA	5'	Gm12:37094765:37094863:-	-46.1	72	80	1.11
	gly_13f	CTTAAATGGATTGGATCTTGA	5'	Gm11:35031000:35031097:-	-42.4	72	80	1.11
	gly_13g	CTTAAATGGATTGGATCTTGA	5'	Gm10:4635902:4636116:+	-79.1	72	80	1.11
	gly_13h	CTTAAATGGATTGGATCTTGA	5'	Gm07:13683421:13683518:-	-46.2	72	80	1.11
	gly_13i	CTTAAATGGATTGGATCTTGA	5'	Gm07:42931413:42931510:+	-51.5	72	80	1.11
	gly_13j	CTTAAATGGATTGGATCTTGA	5'	Gm06:39048243:39048358:-	-53.2	72	80	1.11
	gly_13k	CTTAAATGGATTGGATCTTGA	5'	Gm06:22728700:22728798:-	-43.5	72	80	1.11
	gly_13l	CTTAAATGGATTGGATCTTGA	5'	Gm05:14960200:14960296:+	-45.5	72	80	1.11
	gly_13m	CTTAAATGGATTGGATCTTGA	5'	Gm05:4272932:4273029:+	-48.6	72	80	1.11
	gly_13n	CTTAAATGGATTGGATCTTGA	5'	Gm01:28289348:28289444:-	-42.7	72	80	1.11
	gly_13o	CTTAAATGGATTGGATCTTGA	5'	Gm01:5733903:5733997:+	-39.4	72	80	1.11
	miR396l	ATTCAAGATAGCTGTGGAAAA	3'	Gm17:35366529:35366672:-	-53.3	27	29	1.07
	gly_15	TTTAAACAATATCCTGGAGAT	5'	Gm04:44568204:44568328:-	-54	32	7	0.22
	gly_16	CGGATTATGGTATATGTTCTT	3'	Gm03:45559347:45559504:-	-53.7	240	86	0.36
	gly_17	GGAGGCGTAGATACTCACACCT	3'	Gm04:28532443:28532536:-	-49.7	21	8	0.38
	gly_18	CAGATAAAGCTATGAAGTGAG	3'	Gm04:33363384:33363625:+	-54.8	55	21	0.38
	gly_19	TGTGAATGAAGCAGGAGATAT	3'	Gm04:46348842:46348957:+	-41.1	37	16	0.43
	miR5037e	AACCCTCAAAGGCTTCCACTAC	5'	Gm18:61631517:61631620:-	-41.1	31	14	0.45
	gly_20	CAGGAAACAACTAGGAAATGC	3'	Gm18:54327830:54328015:+	-79.4	346	191	0.55
	gly_21a	TTCTAATTTATCAGGGACTAA	3'	Gm17:19846241:19846404:+	-47.5	32	18	0.56
	gly_21b	TTCTAATTTATCAGGGACTAA	3'	Gm16:8096019:8096185:+	-79.8	32	18	0.56
	gly_21c	TTCTAATTTATCAGGGACTAA	3'	Gm07:17786347:17786503:+	-38.4	32	18	0.56
	gly_21d	TTCTAATTTATCAGGGACTAA	3'	Gm05:9977544:9977700:-	-46	32	18	0.56
	gly_22	TTATGGAAGAAGCTCAATTCA	3'	Gm09:109565:109722:-	-53.3	37	21	0.57
	miR1507d	AGAGGTGTTTGGGATGAGAG	5'	Gm09:16565920:16566038:-	-44.7	1068	647	0.61
	miR4405b	ATATTTTCTAAGACGGTTATT	3'	Gm04:34315950:34316105:-	-74.4	68	42	0.62
	gly_23	TACAGATCTTTGGAAACAGGCA	3'	Gm02:42141385:42141491:+	-47.8	16	10	0.63
	gly_24	GGAATGTCGTTTGGTTCGAGA	5'	Gm10:2905320:2905422:-	-57.2	182	115	0.63
	gly_25a	ACATATAAAATAGTTTTCTAA	3'	Gm18:29620793:29620900:-	-54.8	26	19	0.73
	gly_25b	ACATATAAAATAGTTTTCTAA	3'	Gm18:3402620:3402707:-	-25.5	26	19	0.73
	gly_25c	ACATATAAAATAGTTTTCTAA	3'	Gm18:29620792:29620899:+	-54.6	26	19	0.73
	gly_25d	ACATATAAAATAGTTTTCTAA	3'	Gm06:45100817:45100917:-	-52.2	26	19	0.73
	gly_25e	ACATATAAAATAGTTTTCTAA	3'	Gm10:6636180:6636267:-	-31.7	26	19	0.73
	gly_25f	ACATATAAAATAGTTTTCTAA	3'	Gm15:37277120:37277207:-	-33.6	26	19	0.73
	gly_25g	ACATATAAAATAGTTTTCTAA	3'	Gm15:37421666:37421753:-	-37.7	26	19	0.73
	gly_25h	ACATATAAAATAGTTTTCTAA	3'	Gm15:37480614:37480701:-	-37.7	26	19	0.73
	gly_25i	ACATATAAAATAGTTTTCTAA	3'	Gm15:37461824:37461911:-	-37.7	26	19	0.73
	gly_25j	ACATATAAAATAGTTTTCTAA	3'	Gm17:12625806:12625906:+	-56.1	26	19	0.73
	gly_25k	ACATATAAAATAGTTTTCTAA	3'	Gm17:12625807:12625907:-	-56.1	26	19	0.73
	gly_26	ACCAGATGAATTCACACTAAC	5'	Gm20:26233269:26233370:-	-48.3	83	64	0.77
	gly_27	TCAACTAACTTGAAGGACGAA	5'	Gm15:28664008:28664115:+	-27.7	28	22	0.79
	gly_28	TGGGGCTTGATCCAAGATAGG	3'	Gm18:10413935:10414028:+	-50.8	43	36	0.84
	gly_29	CTAAGACGATTGTTTGTAATA	3'	Gm14:19673165:19673347:-	-81.4	76	65	0.86
	miR156ab	ACAGAAGAGAGTGAGCACAC	5'	Gm06:4699132:4699253:-	-56.1	376	328	0.87
	miR156ac	ACAGAAGAGAGTGAGCACAC	5'	Gm04:4990842:4990962:-	-55.6	376	328	0.87
	miR156ad	ACAGAAGAGAGTGAGCACAC	5'	Gm17:38431866:38431973:-	-49.8	376	328	0.87
	miR156ae	ACAGAAGAGAGTGAGCACAC	5'	Gm14:9431590:9431718:+	-54.7	376	328	0.87
	miR156af	ACAGAAGAGAGTGAGCACAC	5'	Gm04:4257059:4257160:+	-58.6	376	328	0.87
	miR156ag	ACAGAAGAGAGTGAGCACAC	5'	Gm06:4013572:4013673:+	-58.4	376	328	0.87
	miR166v	TCGGACCAGGCTTCATTCCTC	3'	Gm19:36649678:36649997:-	-112.8	100	88	0.88
	miR166w	TCGGACCAGGCTTCATTCCTC	3'	Gm16:3661255:3661616:+	-130.5	100	88	0.88
	gly_30	GTGGACATGCCGGAGTGGTT	3'	Gm08:8481417:8481647:+	-56.7	271	251	0.93
	gly_31	ATACATATCGTGTTGCCAAGC	5'	Gm13:41358339:41358461:+	-60.8	98	93	0.95
	miR397c	ATTGAGTGCAGCGTTGATGAA	5'	Gm08:4639046:4639152:-	-45.7	862	854	0.99
	gly_14	CAAGTAGATTGAGCCAGAGATG	5'	Gm14:22838069:22838233:-	-50.8	31	31	1
