# Supplementary material for: Identification and Dynamic Regulation of microRNAs Involved in Salt Stress Responses in Functional Soybean Nodules by High-Throughput Sequencing
Source: Int J Mol Sci. 2013 Jan 28;14(2):2717–38. doi: 10.3390/ijms14022717 (PMC3588011; doi:10.3390/ijms14022717)
Supplement: Supplementary File 5 — Supplementary Table 4 (XLS, 27 KB) [file ijms-14-02717-s005.xls]

## Sheet: Sheet1
	Table S4. The novel miRNAs and their expression in NSN or SSN libraries only.
	Name	miRNA sequence	Arm	pre-miRNA location	MFE	Reads
						NSN	SSN
	miR1513e	AAAGCCATGACTTACACACGC	5'	Gm17:1401437:1401518:-	-42.2		475
	miR167k	TGAAGCTGCCAGCCTGATCTT	5'	Gm02:307523:307611:-	-34.3		343
	gly_32	CGCCAAAGAAGAGTTGTCCTG	3'	Gm17:10900636:10900727:+	-36.9		329
	miR2111g	TAATCTGCATCCTGAGGTTT	5'	Gm01:31787453:31787538:+	-39.8		187
	miR399l	TGCCAAAGGAGATTTGCCCTG	3'	Gm05:34951412:34951529:+	-54.4		163
	miR399m	TGCCAAAGGAGATTTGCCCTG	3'	Gm08:9114311:9114428:+	-53.8		163
	gly_33a	CAAACTAATCTTGATTGGGCTG	5'	Gm12:32340039:32340153:-	-28.9		62
	gly_33b	CAAACTAATCTTGATTGGGCTG	5'	Gm06:19079272:19079386:+	-30.3		62
	miR398d	TGTGTTCTCAGGTCGCCCCTG	3'	Gm08:14299237:14299369:-	-60.8		59
	gly_34	CATCTTCAACTTGCTCAACGG	5'	Gm16:30111973:30112055:+	-43.8		46
	gly_35	TATATTTGTAAATTTTAGGCAC	3'	Gm14:41954319:41954474:-	-29.5		35
	gly_36	TAAGACGGTGCTGACATCACGA	5'	Gm09:33092118:33092255:+	-71.4		34
	gly_37a	GCGTATGAGGAGTCATGCATG	3'	Gm10:4733496:4733599:-	-52.2	87
	gly_37b	GCGTATGAGGAGTCATGCATG	3'	Gm13:23749975:23750082:-	-52.3	87
	miR167l	TGAAGCTGCCAGCCTGATCTTA	5'	Gm02:307523:307611:-	-34.3	84
	miR2111h	TAATCTGCATCCTGAGGTTTA	5'	Gm07:16402351:16402433:-	-45.6	82
	miR2111i	TAATCTGCATCCTGAGGTTTA	5'	Gm01:31787453:31787538:+	-39.8	82
	miR2112j	TAATCTGCATCCTGAGGTTTA	5'	Gm18:49934381:49934486:-	-44	82
	miR399n	TGCCAAAGGAGATTTGCCCT	3'	Gm05:34951412:34951528:+	-53.8	56
	miR399o	TGCCAAAGGAGATTTGCCCT	3'	Gm08:9114319:9114417:+	-42.9	56
	miR862c	GCTGGATGTCTTTGAAGGAAC	3'	Gm08:46853888:46854011:+	-42	53
	gly_38	TATGGATAACATGCAGAAGCT	5'	Gm18:34200523:34200636:+	-54.7	51
	miR862d	GCTGGATGTCTTTGAAGGAAT	3'	Gm18:61624595:61624704:-	-42.5	51
	miR408e	GCTGGGAACAGGCAGAGCACG	5'	Gm19:47163685:47163821:-	-42.69	46
	gly_39	TCTTGGGACAGAGGTATCAATAC	5'	Gm08:4270886:4271063:-	-79.4	40
	miR1520s	TTGACCAATCAAAACATGACA	3'	Gm13:27429341:27429439:-	-37.8	35
	gly_40a	AAATTAGAAGATCAAATTGA	5'	Gm02:9877923:9878114:-	-39.7	28
	gly_40b	AAATTAGAAGATCAAATTGA	5'	Gm11:36587596:36587859:+	-54.1	28
	gly_40c	AAATTAGAAGATCAAATTGA	5'	Gm18:52073025:52073212:+	-47	28
	gly_41a	GCGTGCGAGGAGCCATGCATG	3'	Gm03:41268407:41268513:-	-63.8	22
	gly_41b	GCGTGCGAGGAGCCATGCATG	3'	Gm19:43795944:43796051:-	-58.5	22
	gly_42	AGTTGATGATAATAAATGAA	5'	Gm14:13037548:13037788:+	-41.3	22
	gly_43	TTTTAAGACGGTTGTTAGCTAA	5'	Gm15:16622255:16622354:+	-33.3	22
	miR4357b	CAGTCGTGTGATTGTACGGTT	3'	Gm05:28486211:28486397:-	-51.3	22
	miR4357c	CAGTCGTGTGATTGTACGGTT	3'	Gm16:25363104:25363290:-	-44.1	22
	gly_44a	AGATATTGAGCTGGTAGATGAG	3'	Gm02:38406240:38406364:+	-60.1	21
	gly_44b	AGATATTGAGCTGGTAGATGAG	3'	Gm04:36054334:36054457:-	-63.8	21
	gly_44c	AGATATTGAGCTGGTAGATGAG	3'	Gm07:21834157:21834282:-	-66.2	21
	gly_44d	AGATATTGAGCTGGTAGATGAG	3'	Gm10:27337135:27337260:+	-78.2	21
	gly_44e	AGATATTGAGCTGGTAGATGAG	3'	Gm14:12615238:12615363:+	-66.6	21
	gly_44f	AGATATTGAGCTGGTAGATGAG	3'	Gm18:15474680:15474805:+	-67.8	21
	gly_44g	AGATATTGAGCTGGTAGATGAG	3'	Gm18:12719394:12719518:-	-65.6	21
	gly_44h	AGATATTGAGCTGGTAGATGAG	3'	Gm19:7602747:7602871:+	-61.4	21
	gly_45	TAAAGGACAAATAGTTAAGAAA	3'	Gm05:14712477:14712591:-	-50.2	21
	gly_46	AGGTAAAATGAATTGAGTTTC	5'	Gm16:2717409:2717580:+	-46.2	21
	gly_47	AGGCTGATAGTTCAACAAGGCAA	5'	Gm16:28407538:28407722:+	-88.6	21
