# Supplementary material for: Identification and Dynamic Regulation of microRNAs Involved in Salt Stress Responses in Functional Soybean Nodules by High-Throughput Sequencing
Source: Int J Mol Sci. 2013 Jan 28;14(2):2717–38. doi: 10.3390/ijms14022717 (PMC3588011; doi:10.3390/ijms14022717)
Supplement: Supplementary File 6 — Supplementary Table 5 (XLS, 28 KB) [file ijms-14-02717-s006.xls]

## Sheet: Sheet1
	Table S5. Top 10 highly expressed miRNAs in leaf, shoot apical meristem and nodule.
	Rank	miRNA
		Leaf[44]	SAM[44]	Nodule (NSN)
	1	gma-miR482c	gma-miR159a	gma-miR156c,d,e
	2	gma-miR482d	gma-miR482c	gma-miR156a
	3	gma-miR159a	gma-miR482d	gma-miR1507a,b
	4	gma-miR1511	gma-miR2109	gma-miR159a
	5	gma-miR482a	gma-miR167d	gma-miR1509b
	6	gma-miR482e	gma-miR167e	gma-miR166a,b
	7	gma-miR168	gma-miR167g	gma-miR1511
	8	gma-miR2109	gma-miR167h	gma-miR167c
	9	gma-miR1507c	gma-miR168	gma-miR167d
	10	gma-miR1510	gma-miR1511	gma-miR167e
	Note: SAM means shoot apical meristem
