# Supplementary material for: Identification and Dynamic Regulation of microRNAs Involved in Salt Stress Responses in Functional Soybean Nodules by High-Throughput Sequencing
Source: Int J Mol Sci. 2013 Jan 28;14(2):2717–38. doi: 10.3390/ijms14022717 (PMC3588011; doi:10.3390/ijms14022717)
Supplement: Supplementary File 7 — Supplementary Table 6 (XLS, 23 KB) [file ijms-14-02717-s007.xls]

## Sheet: Sheet1
	Table S6. Conservation analysis of the novel miRNAs in seven plant species.
	Name	miRNA sequence	Location	NSN	SSN	Ratio	Conservation
	miR1513b	AAAGCCATGACTTACACACGC	5'		475		gma
	miR1520s	TTGACCAATCAAAACATGACA	3'	35			gma
	miR4357b,c	CAGTCGTGTGATTGTACGGTT	3'	22			gma
	miR4416d	ACGGGTCGCTCTCACCTGGAG	3'	12	79	6.58	gma
	miR4416c	ATACGGGTCGCTCTCACCTAGG	3'	637	1881	2.95	gma
	miR862c	GCTGGATGTCTTTGAAGGAAC	3'	53			gma
	miR1507d	AGAGGTGTTTGGGATGAGAG	5'	1068	647	0.61	gma
	miR4405b	ATATTTTCTAAGACGGTTATT	3'	68	42	0.62	gma
	miR862d	GCTGGATGTCTTTGAAGGAAT	3'	51			gma
	miR5037e	AACCCTCAAAGGCTTCCACTAC	5'	31	14	0.45	gma,mtr
	miR398d	TGTGTTCTCAGGTCGCCCCTG	3'		59		gma,mtr,ath,osa,vvi,ptc
	miR156aa	CTGACAGAAGATAGAGAGCAC	5'	20706	34689	1.68	gma,mtr,ath,osa,vvi,ptc,zma
	miR156ab-ag	ACAGAAGAGAGTGAGCACAC	5'	376	328	0.87	gma,mtr,ath,osa,vvi,ptc,zma
	miR164l	TGGAGAAGCAGGGCACATGCT	5'	25	36	1.44	gma,mtr,ath,osa,vvi,ptc,zma
	miR167k	TGAAGCTGCCAGCCTGATCTT	5'		343		gma,mtr,ath,osa,vvi,ptc,zma
	miR167i	TGAAGCTGCCAGCCTGATCTTA	5'	84			gma,mtr,ath,osa,vvi,ptc,zma
	miR393i	TTCCAAAGGGATCGCATTGATC	5'	263	234	0.89	gma,mtr,ath,osa,vvi,ptc,zma
	miR396l	ATTCAAGATAGCTGTGGAAAA	3'	27	29	1.07	gma,mtr,ath,osa,vvi,ptc,zma
	miR166v,w	TCGGACCAGGCTTCATTCCTC	3'	100	88	0.88	gma,mtr,pvu,ath,osa,vvi,ptc,zma
	miR482f	GGAATGGGCTGATTGGGAAGT	5'	1497	2228	1.49	gma,pvu
	miR399i	CGCCAAAGAAGATTTGCCCGG	3'	9	41	4.56	mtr,pvu,ath,osa,vvi,ptc,zma
	miR399j,k	TGCCAAAGGAGAGCTGCCCTG	3'	376	1236	3.29	mtr,pvu,ath,osa,vvi,ptc,zma
	miR399e,f	TGCCAAAGGAGATTTGCCCTG	3'		163		mtr,pvu,ath,osa,vvi,ptc,zma
	miR399n,o	TGCCAAAGGAGATTTGCCCT	3'	56			mtr,pvu,ath,osa,vvi,ptc,zma
	miR408e	GCTGGGAACAGGCAGAGCACG	5'	46			ahy
	miR2111e	TAATCTGCATCCTGAGGTTT	5'		187		ath
	miR2111h,i,g	TAATCTGCATCCTGAGGTTTA	5'	82			ath
	miR397c	ATTGAGTGCAGCGTTGATGAA	5'	862	854	0.99	ath,osa,vvi,ptc
