# Supplementary material for: Identification and Dynamic Regulation of microRNAs Involved in Salt Stress Responses in Functional Soybean Nodules by High-Throughput Sequencing
Source: Int J Mol Sci. 2013 Jan 28;14(2):2717–38. doi: 10.3390/ijms14022717 (PMC3588011; doi:10.3390/ijms14022717)
Supplement: Supplementary File 8 — Supplementary Table 7 (XLS, 28 KB) [file ijms-14-02717-s008.xls]

## Sheet: Sheet1
	Table S7. Statistical analysis of qPCR results.
	miR4416d	Treament	Mean	5% significance level	1% significance level
		6h	1.7573	a	A
		12h	1.3797	ab	AB
		3h	1.1083	b	BC
		24h	1.069	b	BC
		0h	1	bc	BC
		1h	0.5557	c	C
	miR171p	Treament	Mean	5%significance level	1% significance level
		24h	2.7787	a	A
		6h	2.0387	b	B
		12h	1.3277	c	BC
		0h	1	cd	CD
		3h	0.8663	cd	CD
		1h	0.5927	d	D
	gly_37	Treament	Mean	5%significance level	1% significance level
		0h	1	a	A
		3h	0.446	b	B
		1h	0.279	bc	BC
		12h	0.2087	cd	BC
		6h	0.1633	cd	C
		24h	0.0663	d	C
	miR2111bcfg	Treament	Mean	5%significance level	1% significance level
		12h	11.9603	a	A
		1h	5.8883	b	B
		6h	5.247	b	BC
		3h	3.13	bc	BC
		24h	1.2517	c	C
		0h	1	c	C
	gly_3	Treament	Mean	5%significance level	1% significance level
		6h	7.6793	a	A
		3h	4.455	b	B
		24h	4.25	b	B
		12h	2.82	bc	BC
		0h	1	cd	C
		1h	0.743	d	C
	miR862e	Treament	Mean	5%significance level	1% significance level
		0h	1	a	A
		12h	0.57	b	B
		24h	0.4433	bc	BC
		1h	0.4033	bc	BC
		3h	0.2833	cd	CD
		6h	0.17	d	D
	miR169t	Treament	Mean	5%significance level	1% significance level
		0h	1	a	A
		24h	0.7733	ab	AB
		6h	0.5567	bc	BC
		12h	0.4517	c	BC
		1h	0.45	c	BC
		3h	0.3333	c	C
	gly_1	Treament	Mean	5%significance level	1% significance level
		24h	5.7093	a	A
		6h	1.6073	b	B
		0h	1	c	B
		1h	0.5293	c	B
		12h	0.4483	c	B
		3h	0.4013	c	B
	Note: The values in the same column no the same small or captial letters show significant difference , <0.01 and p<0.05, respectively. Analyzed by DPS (Data Processing System).
