# Supplementary material for: Identification and Dynamic Regulation of microRNAs Involved in Salt Stress Responses in Functional Soybean Nodules by High-Throughput Sequencing
Source: Int J Mol Sci. 2013 Jan 28;14(2):2717–38. doi: 10.3390/ijms14022717 (PMC3588011; doi:10.3390/ijms14022717)
Supplement: Supplementary File 9 — Supplementary Table 8 (XLS, 151 KB) [file ijms-14-02717-s009.xls]

## Sheet: 重新命名
		Name	miRNA Sequence	SSN Number	NSN Number	SSN∕NSN
		gma-miR166a,b	UCGGACCAGGCUUCAUUCCCC	108532	31122	3.48731
		gma-miR482	UCUUCCCAAUUCCGCCCAUUCCUA	940	303	3.10231
	gma	gma-miR1520b	GUGACAGUCAUCAUUUAAUAAGA	3	1	3
		gma-miR390a-3p	CGCUAUCCAUCCUGAGUUUC	274	106	2.58491
	gma mtr	gma-miR1510a	UUGUUGUUUUACCUAUUCCACCC	6402	3463	1.84869
		gma-miR167c	UGAAGCUGCCAGCAUGAUCUG	42750	23629	1.80922
	gma	gma-miR1512	UAACUGAAAAUUCUUAAAGUAU	9	5	1.8
		gma-miR167e,f	UGAAGCUGCCAGCAUGAUCUU	33965	19557	1.73672
		gma-miR167a,b,d	UGAAGCUGCCAGCAUGAUCUA	36346	21623	1.6809
		gma-miR168	UCGCUUGGUGCAGGUCGGGAA	16032	10116	1.58482
	gma mtr	gma-miR1510b	UGUUGUUUUACCUAUUCCACC	4562	2904	1.57094
	gma	gma-miR2107	CAAACCUCCGUAGCCUGUAUC	3	2	1.5
		gma-miR398a,b	UGUGUUCUCAGGUCACCCCUU	341	235	1.45106
	gma	gma-miR1515	UCAUUUUGCGUGCAAUGAUCUG	266	184	1.44565
		gma-miR172a,b	AGAAUCUUGAUGAUGCUGCAU	9826	7257	1.354
		gma-miR390a-5p	AAGCUCAGGAGGGAUAGCGCC	2004	1494	1.34137
		gma-miR171b	CGAGCCGAAUCAAUAUCACUC	6343	4824	1.31488
	gma mtr gso vun 豇豆	gma-miR1507a,b	UCUCAUUCCAUACAUCGUCUGA	173975	133760	1.30065
	gma	gma-miR1513	UGAGAGAAAGCCAUGACUUAC	63	49	1.28571
		gma-miR396b,c	UUCCACAGCUUUCUUGAACUU	2217	1748	1.26831
		gma-miR390b	AAGCUCAGGAGGGAUAGCACC	21	17	1.23529
		gma-miR396a	UUCCACAGCUUUCUUGAACUG	3810	3197	1.19174
	gma	gma-miR1535	CUUGUUUGUGGUGAUGUCU	370	315	1.1746
		gma-miR164	UGGAGAAGCAGGGCACGUGCA	1271	1112	1.14299
		gma-miR162	UCGAUAAACCUCUGCAUCCA	1076	944	1.13983
		gma-miR159c	AUUGGAGUGAAGGGAGCUCCG	21	335	0.0626866
		gma-miR159b	AUUGGAGUGAAGGGAGCUCCA	11	158	0.0696203
		gma-miR169c	AAGCCAAGGAUGACUUGCCGA	5	68	0.0735294
		gma-miR319a,b	UUGGACUGAAGGGAGCUCCC	2	20	0.1
	gma	gma-miR1517	AGUCUUGGUCAAUGUCGUUCGAAA	2	9	0.222222
	gma	gma-miR1520c	UUCAAUAAGAACGUGACACGUGA	7	21	0.333333
		gma-miR160	UGCCUGGCUCCCUGUAUGCCA	180	459	0.392157
		gma-miR169b	CAGCCAAGGAUGACUUGCCGA	15	34	0.441176
	gma	gma-miR1523	AUGGGAUAAAUGUGAGCUCA	17	37	0.459459
	gma	gma-miR1521	CUGUUAAUGGAAAAUGUUGA	1	2	0.5
		gma-miR1519	UAAGUGUUGCAAAAUAGUCAUU	1	2	0.5
		gma-miR159a	UUUGGAUUGAAGGGAGCUCUA	5225	10096	0.517532
	gma mtr puv四季豆	gma-miR2119	UCAAAGGGAGUUGUAGGGGAA	431	778	0.553985
		gma-miR156c,d,e	UUGACAGAAGAUAGAGAGCAC	228818	393772	0.581093
	gma	gma-miR1511	AACCAGGCUCUGAUACCAUG	16661	28100	0.592918
	gma puv四季豆	gma-miR1514b	UUCAUUUUUAAAAUAGACAUU	13	21	0.619048
	gma	gma-miR1518	UGUGUUGUAAAGUGAAUAUCA	10	16	0.625
		gma-miR169a	CAGCCAAGGAUGACUUGCCGG	14	22	0.636364
	gma	gma-miR1536	AAGCAGAGACAAAUGUGUUUA	23	36	0.638889
	gma gso野生大豆	gma-miR2109	UGCGAGUGUCUUCGCCUCUG	5240	7974	0.657136
	gma	gma-miR1520d	AUCAGAACAUGACACGUGACAA	329	442	0.744344
	gma puv四季豆	gma-miR1514a	UUCAUUUUUAAAAUAGGCAUU	512	685	0.747445
		gma-miR156a	UGACAGAAGAGAGUGAGCAC	160598	204878	0.783871
	gma	gma-miR1520a	UAGAACAUGAUACAUGACAGUCA	11	14	0.785714
		gma-miR393	UCCAAAGGGAUCGCAUUGAUC	118	148	0.797297
	gma gso野生大豆	gma-miR1508a	UCUAGAAAGGGAAAUAGCAGUUG	872	998	0.873747
	gma mtr gso野生大豆	gma-miR1509b	UUAAUCAAGGAAAUCACGGUU	59096	62260	0.949181
		gma-miR172d,e	GGAAUCUUGAUGAUGCUGCAGCAG	5034	5291	0.951427
		gma-miR172c	GGAAUCUUGAUGAUGCUGCAG	5034	5291	0.951427
		gma-miR156b	UGACAGAAGAGAGAGAGCACA	249	258	0.965116
	gma mtr gso野生大豆	gma-miR1509a	UUAAUCAAGGAAAUCACGGUCG	126294	127333	0.99184
		gma-miR171a	UGAGCCGUGCCAAUAUCACGA	5	5	1
	gma	gma-miR1527	UAACUCAACCUUACAAAACC	5	5	1
	gma	gma-miR2108a	UUAAUGUGUUGUGUUUGUCGG	3	3	1
	gma	gma-miR2108b	UUAAUGUGUUGUGUUUGUGAG	1	1	1
	gma	gma-miR1529	UUAAAGGAAACAAUUAAUCGUUA	1	1	1
	gma	gma-miR1532	AACACGCUAAGCGAGAGGAGCUC	0	3
	gma	gma-miR1528	AUAGAUUAGAUCAAUAUAUUAGU	0	1
	gma	gma-miR1516	CAAAAGAGCUUAUGGCUUGUA	3	0
	new name	Name	miRNA sequence	Location	NS Num.	NCK Num.	NS∕NCK	Conservation	MiRNA Family		21个家族60个miRNA
1	miR4416b	gly_1a	ACGGGTCGCTCTCACCTGGAG	3'	79	12	6.58	gma	MIR4416	37个miRNA
2	miR171d	gly_3	TTGAGCCGCGTCAATATCTTA	3'	67	12	5.58	gma,mtr,ath,osa,vvi,ptc,zma	MIR171
3	miR399a	gly_6	CGCCAAAGAAGATTTGCCCGG	3'	41	9	4.56	mtr,pvu,ath,osa,vvi,ptc,zma	MIR399
4	miR399b,c	gly_7a,b	TGCCAAAGGAGAGCTGCCCTG	3'	1236	376	3.29	mtr,pvu,ath,osa,vvi,ptc,zma	MIR399
5	miR171g-j	gly_11a-d	TGATTGAGCCGTGCCAATATC	3'	46	15	3.07	gma,mtr,ath,osa,vvi,ptc,zma	MIR171
6	miR4416c	gly_1b	ATACGGGTCGCTCTCACCTAGG	3'	1881	637	2.95	gma	MIR4416
7	miR171k	gly_13	TTGAGCCGTGCCAATATCACA	3'	46	18	2.56	gma,mtr,ath,osa,vvi,ptc,zma	MIR171
8	miR408a,b	gly_15a,b	CAGGGGAACAGGCAGAGCATG	5'	777	322	2.41	ahy	MIR408
9	miR395a,b	gly_16a,b	CTGAAGTGTTTGGGGGAACTC	3'	124	54	2.3	mtr,ath,osa,vvi,ptc,zma	MIR395
10	miR156h	gly_18a	CTGACAGAAGATAGAGAGCAC	5'	34689	20706	1.68	gma,mtr,ath,osa,vvi,ptc,zma	MIR156
11	miR171e,f	gly_4a,b	CGAGCCGAATCAATACCACTC	3'	16671	10462	1.59	gma,ath,osa,vvi,ptc,zma	MIR171
12	miR482c	gly_21	GGAATGGGCTGATTGGGAAGT	5'	2228	1497	1.49	gma,pvu	MIR482
13	miR164b	gly_24	TGGAGAAGCAGGGCACATGCT	5'	36	25	1.44	gma,mtr,ath,osa,vvi,ptc,zma	MIR164
14	miR156i	gly_18b	CTGACAGAAGATAGAGAGCAT	3'	5152	4175	1.23	gma,mtr,ath,osa,vvi,ptc,zma	MIR156
15	miR156j,k	gly_18c,d	TGACAGAAGAGAGTGAGCACT	5'	328	291	1.13	gma,mtr,ath,osa,vvi,ptc,zma	MIR156
16	miR396f	gly_30	ATTCAAGATAGCTGTGGAAAA	3'	29	27	1.07	gma,mtr,ath,osa,vvi,ptc,zma	MIR396
17	miR1512b	gly_42	TAACTGAACATTCTTAGAGCAT	5'	5839	10778	0.54	gma	MIR1512
18	miR156l-q	gly_18e-j	ACAGAAGAGAGTGAGCACAC	5'	328	376	0.87	gma,mtr,ath,osa,vvi,ptc,zma	MIR156
19	miR172g,h	gly_64a,b	GGAATCTTGATGATGCTGCAT	3'	947	1086	0.87	gma,mtr,ath,osa,vvi,ptc,zma	MIR172
20	miR166c,d	gly_112a,b	TCGGACCAGGCTTCATTCCTC	3'	88	100	0.88	gma,mtr,pvu,ath,osa,vvi,ptc,zma	MIR166
21	miR393b	gly_66	TTCCAAAGGGATCGCATTGATC	5'	234	263	0.89	gma,mtr,ath,osa,vvi,ptc,zma	MIR393
22	miR397a	gly_69	ATTGAGTGCAGCGTTGATGAA	5'	854	862	0.99	ath,osa,vvi,ptc	MIR397
23	miR1513b	gly_14	AAAGCCATGACTTACACACGC	5'	475			gma	MIR1513	23个miRNA	11+12
24	miR167h	gly_72a	TGAAGCTGCCAGCCTGATCTT	5'	343			gma,mtr,ath,osa,vvi,ptc,zma	MiR167
25	miR2111a-d	gly_75a-d	TAATCTGCATCCTGAGGTTT	5'	187			ath	MIR2111
26	miR399e,f	gly_7c,d	TGCCAAAGGAGATTTGCCCTG	3'	163			mtr,pvu,ath,osa,vvi,ptc,zma	MIR399
27	miR398c	gly_78	TGTGTTCTCAGGTCGCCCCTG	3'	59			gma,mtr,ath,osa,vvi,ptc	MIR398
28	miR172i,j	gly_83a,b	GCAGCAGCATCAAGATTCACA	5'	32			gma,mtr,ath,osa,vvi,ptc,zma	MIR172
29	miR169f	gly_87	TAGCCAAGGATGGACTTGCCTA	5'		157		gma,mtr,ath,osa,vvi,ptc,zma	MIR169
30	miR167i	gly_72b	TGAAGCTGCCAGCCTGATCTTA	5'		84		gma,mtr,ath,osa,vvi,ptc,zma	MIR167
31	miR2111e,f,g	gly_75e,f,g	TAATCTGCATCCTGAGGTTTA	5'		82		ath	MIR2111
32	miR399g,h	gly_7e,f	TGCCAAAGGAGATTTGCCCT	3'		56		mtr,pvu,ath,osa,vvi,ptc,zma	MIR399
33	miR408c	gly_15c	GCTGGGAACAGGCAGAGCACG	5'		46		ahy	MIR408
34	miR1520s	gly_96	TTGACCAATCAAAACATGACA	3'		35		gma	MIR1520
35	miR169g	gly_102	AAGCCAAGGATGACTTGCCGG	5'		26		gma,mtr,ath,osa,vvi,ptc,zma	MIR169
36	miR4357b,c	gly_104a,b	CAGTCGTGTGATTGTACGGTT	3'		22		gma	MIR4357
	new name	Name	miRNA sequence	Location	NS Num.	NCK Num.	NS∕NCK	Conservation	MiRNA Family		21个家族60个miRNA
	miR1512b	gly_42	TAACTGAACATTCTTAGAGCAT	5'	5839	10778	0.54	gma	MIR1512
	miR1513b	gly_14	AAAGCCATGACTTACACACGC	5'	475			gma	MIR1513
	miR1520s	gly_96	TTGACCAATCAAAACATGACA	3'		35		gma	MIR1520
	miR4357b,c	gly_104a,b	CAGTCGTGTGATTGTACGGTT	3'		22		gma	MIR4357
	miR4416b	gly_1a	ACGGGTCGCTCTCACCTGGAG	3'	79	12	6.58	gma	MIR4416
	miR4416c	gly_1b	ATACGGGTCGCTCTCACCTAGG	3'	1881	637	2.95	gma	MIR4416
	miR171e,f	gly_4a,b	CGAGCCGAATCAATACCACTC	3'	16671	10462	1.59	gma,ath,osa,vvi,ptc,zma	MIR171
	miR398c	gly_78	TGTGTTCTCAGGTCGCCCCTG	3'	59			gma,mtr,ath,osa,vvi,ptc	MIR398
	miR156h	gly_18a	CTGACAGAAGATAGAGAGCAC	5'	34689	20706	1.68	gma,mtr,ath,osa,vvi,ptc,zma	MIR156
	miR156i	gly_18b	CTGACAGAAGATAGAGAGCAT	3'	5152	4175	1.23	gma,mtr,ath,osa,vvi,ptc,zma	MIR156
	miR156j,k	gly_18c,d	TGACAGAAGAGAGTGAGCACT	5'	328	291	1.13	gma,mtr,ath,osa,vvi,ptc,zma	MIR156
	miR156l-q	gly_18e-j	ACAGAAGAGAGTGAGCACAC	5'	328	376	0.87	gma,mtr,ath,osa,vvi,ptc,zma	MIR156
	miR164b	gly_24	TGGAGAAGCAGGGCACATGCT	5'	36	25	1.44	gma,mtr,ath,osa,vvi,ptc,zma	MIR164
	miR167h	gly_72a	TGAAGCTGCCAGCCTGATCTT	5'	343			gma,mtr,ath,osa,vvi,ptc,zma	MiR167
	miR167i	gly_72b	TGAAGCTGCCAGCCTGATCTTA	5'		84		gma,mtr,ath,osa,vvi,ptc,zma	MIR167
	miR169f	gly_87	TAGCCAAGGATGGACTTGCCTA	5'		157		gma,mtr,ath,osa,vvi,ptc,zma	MIR169
	miR169g	gly_102	AAGCCAAGGATGACTTGCCGG	5'		26		gma,mtr,ath,osa,vvi,ptc,zma	MIR169
	miR171d	gly_3	TTGAGCCGCGTCAATATCTTA	3'	67	12	5.58	gma,mtr,ath,osa,vvi,ptc,zma	MIR171
	miR171g-j	gly_11a-d	TGATTGAGCCGTGCCAATATC	3'	46	15	3.07	gma,mtr,ath,osa,vvi,ptc,zma	MIR171
	miR171k	gly_13	TTGAGCCGTGCCAATATCACA	3'	46	18	2.56	gma,mtr,ath,osa,vvi,ptc,zma	MIR171
	miR172g,h	gly_64a,b	GGAATCTTGATGATGCTGCAT	3'	947	1086	0.87	gma,mtr,ath,osa,vvi,ptc,zma	MIR172
	miR172i,j	gly_83a,b	GCAGCAGCATCAAGATTCACA	5'	32			gma,mtr,ath,osa,vvi,ptc,zma	MIR172
	miR393b	gly_66	TTCCAAAGGGATCGCATTGATC	5'	234	263	0.89	gma,mtr,ath,osa,vvi,ptc,zma	MIR393
	miR396f	gly_30	ATTCAAGATAGCTGTGGAAAA	3'	29	27	1.07	gma,mtr,ath,osa,vvi,ptc,zma	MIR396
	miR166c,d	gly_112a,b	TCGGACCAGGCTTCATTCCTC	3'	88	100	0.88	gma,mtr,pvu,ath,osa,vvi,ptc,zma	MIR166
	miR482c	gly_21	GGAATGGGCTGATTGGGAAGT	5'	2228	1497	1.49	gma,pvu	MIR482
	miR395a,b	gly_16a,b	CTGAAGTGTTTGGGGGAACTC	3'	124	54	2.3	mtr,ath,osa,vvi,ptc,zma	MIR395
	miR399a	gly_6	CGCCAAAGAAGATTTGCCCGG	3'	41	9	4.56	mtr,pvu,ath,osa,vvi,ptc,zma	MIR399
	miR399b,c	gly_7a,b	TGCCAAAGGAGAGCTGCCCTG	3'	1236	376	3.29	mtr,pvu,ath,osa,vvi,ptc,zma	MIR399
	miR399e,f	gly_7c,d	TGCCAAAGGAGATTTGCCCTG	3'	163			mtr,pvu,ath,osa,vvi,ptc,zma	MIR399
	miR399g,h	gly_7e,f	TGCCAAAGGAGATTTGCCCT	3'		56		mtr,pvu,ath,osa,vvi,ptc,zma	MIR399
	miR408a,b	gly_15a,b	CAGGGGAACAGGCAGAGCATG	5'	777	322	2.41	ahy	MIR408
	miR408c	gly_15c	GCTGGGAACAGGCAGAGCACG	5'		46		ahy	MIR408
	miR2111a-d	gly_75a-d	TAATCTGCATCCTGAGGTTT	5'	187			ath	MIR2111
	miR2111e,f,g	gly_75e,f,g	TAATCTGCATCCTGAGGTTTA	5'		82		ath	MIR2111
	miR397a	gly_69	ATTGAGTGCAGCGTTGATGAA	5'	854	862	0.99	ath,osa,vvi,ptc	MIR397
	Name	new name	miRNA sequence	Location	NS Num.	NCK Num.	NS∕NCK	52个家族93个miRNA
	gly_2	gly_1	GGGCTCCTCTCTCCTGGCATG	5'	285	50	5.7
	gly_5	gly_2	AGCCGCGTCAATATCTTATTT	3'	66	12	5.5
	gly_8	gly_3	TTAGCTTCTTTCACCTTTCCC	3'	53	12	4.42
	gly_9	gly_4	GAGCTCTCAGCACTCCAGTGT	5'	28	9	3.11
	gly_10a-d	gly_5a-d	TATAAATAGGACCAGAGGTAG	3'	31	10	3.1
	gly_12	gly_6	TGGTGATCATTAGGACAATAT	5'	239	81	2.95
	gly_17	gly_7	TCAGGCGGTGGAGCAAATATGAA	5'	21	11	1.91
	gly_19	gly_8	TGTTGGACGGTTCAATCAAA	5'	192	115	1.67
	gly_20	gly_9	CTGAGACTGCATCTGGCTGAAG	3'	104	67	1.55
	gly_22	gly_10	GCAGGTTTGCCCGAGTGGTTAA	3'	362	248	1.46
	gly_23	gly_11	TATGAACCATACGGATTGTCA	3'	16	11	1.46
	gly_25	gly_12	CAACCCGTCTTAGAATGAGCA	5'	62	44	1.41
	gly_26	gly_13	AGAGCCATTCTGAAAGATCCTA	3'	20	15	1.33
	gly_27a,b,c	gly_14a,b,c	TTATCAGTAGCATCATCATCA	5'	215	165	1.3
	gly_28	gly_15	TTAAAGTATAGGGACCAAATT	3'	21	18	1.17
	gly_29	gly_16	CTTAAATGGATTGGATCTTGA	5'	80	72	1.11
	gly_31	gly_17	CAAGTAGATTGAGCCAGAGATG	5'	31	31	1
	gly_32	gly_18	TACTTGGTGAATTGTTGGATC	5'	97	489	0.2
	gly_33	gly_19	TTTAAACAATATCCTGGAGAT	5'	7	32	0.22
	gly_34	gly_20	CGGATTATGGTATATGTTCTT	3'	86	240	0.36
	gly_35	gly_21	GGAGGCGTAGATACTCACACCT	3'	8	21	0.38
	gly_36	gly_22	CAGATAAAGCTATGAAGTGAG	3'	21	55	0.38
	gly_37	gly_23	CATGAGAGGACTAAGCACATAA	3'	11	27	0.41
	gly_38	gly_24	TGTGAATGAAGCAGGAGATAT	3'	16	37	0.43
	gly_39	gly_25	AACCCTCAAAGGCTTCCACTAC	5'	14	31	0.45
	gly_40	gly_26	TGGGTGAGAGAAACGCGTATC	5'	69	145	0.48
	gly_41a,b	gly_27a,b	TGTTAGTGATAAGGCGTGATG	3'	156	290	0.54
	gly_43a-d	gly_28a-d	CAGGAAACAACTAGGAAATGC	3'	191	346	0.55
	gly_44a-f	gly_29a-f	TTCTAATTTATCAGGGACTAA	3'	18	32	0.56
	gly_45	gly_30	TTATGGAAGAAGCTCAATTCA	3'	21	37	0.57
	gly_46	gly_31	AGAGGTGTTTGGGATGAGAG	5'	647	1068	0.61
	gly_47a,b	gly_32a,b	ATATTTTCTAAGACGGTTATT	3'	42	68	0.62
	gly_48	gly_33	TACAGATCTTTGGAAACAGGCA	3'	10	16	0.63
	gly_49	gly_34	GGAATGTCGTTTGGTTCGAGA	5'	115	182	0.63
	gly_50	gly_35	AAAGACAACAGAGAAGTCAAATT	5'	33	52	0.64
	gly_51	gly_36	AAACAGATCTAAATGGATTCC	3'	16	24	0.67
	gly_52	gly_37	TGAAGATGAGAGATTAGTCTGA	5'	90	134	0.67
	gly_53	gly_38	AAAGATTCAAGACATGCATGG	3'	15	22	0.68
	gly_54a-k	gly_39a-k	ACATATAAAATAGTTTTCTAA	3'	19	26	0.73
	gly_55	gly_40	TTAGGACTATGGTTTGGACGA	5'	1907	2549	0.75
	gly_56	gly_41	CGACCACTAGTGGTAGCCTGAC	3'	30	39	0.77
	gly_57	gly_42	AGAAAGTTTCCGGAAGAAGTA	3'	20	26	0.77
	gly_58	gly_43	ACCAGATGAATTCACACTAAC	5'	64	83	0.77
	gly_59	gly_44	TCAACTAACTTGAAGGACGAA	5'	22	28	0.79
	gly_60	gly_45	TGATCTTTGATTTGGAGACTGC	5'	78	95	0.82
	gly_61	gly_46	TGGGGCTTGATCCAAGATAGG	3'	36	43	0.84
	gly_62	gly_47	CTAAGACGATTGTTTGTAATA	3'	65	76	0.86
	gly_63	gly_48	CATGGAAGTGAATCGGGTGAC	5'	258	301	0.86
	gly_65a-q	gly_49a-q	CTTAAATGGATTGGATCTTGA	5'	63	72	0.88
	gly_67	gly_50	GTGGACATGCCGGAGTGGTT	3'	251	271	0.93
	gly_68	gly_51	ATACATATCGTGTTGCCAAGC	5'	93	98	0.95
	gly_70	gly_52	TATTGACGCTGCACTCAATCA	3'	16786	16839	1
	Name	new name	miRNA sequence	Location	NS Num.	NCK Num.		32个家族46个miRNA	11+35
	gly_71a	gly_53a	TCCATTGTCGTCCAGCGGTTA	5'	3999
	gly_73	gly_54	CGCCAAAGAAGAGTTGTCCTG	3'	329
	gly_76	gly_56	TAAGGAGACGTATTTCAAGACC	5'	152
	gly_77a,b	gly_57a,b	CAAACTAATCTTGATTGGGCTG	5'	62
	gly_79	gly_58	CATCTTCAACTTGCTCAACGG	5'	46
	gly_80	gly_59	TATATTTGTAAATTTTAGGCAC	3'	35
	gly_81	gly_60	TAAGACGGTGCTGACATCACGA	5'	34
	gly_82	gly_61	CGAATGGATACTGATACATCTG	3'	33
	gly_84	gly_62	TACTAAAGGATGACGTGGCATG	3'	29
	gly_85	gly_63	TAATTTAAGTTTTGTACGGTAG	5'	27
	gly_71b	gly_53b	TCCATTGTCGTCCAGCGGTTAG	5'		1996
	gly_86	gly_64	AGCAATGGAATTATAGACTGC	3'		195
	gly_88	gly_65	GTATAGACTTCTGATTGGCTTA	5'		126
	gly_89a,b	gly_66a,b	GCGTATGAGGAGTCATGCATG	3'		87
	gly_90	gly_67	AGTGGAACTTTGAGGCCTGC	3'		56
	gly_91	gly_68	GCTGGATGTCTTTGAAGGAAC	3'		53
	gly_92	gly_69	TATGGATAACATGCAGAAGCT	5'		51
	gly_93	gly_70	GCTGGATGTCTTTGAAGGAAT	3'		51
	gly_94	gly_71	TAAAGGTGGAAACTGCTTGTTG	3'		42
	gly_95	gly_72	TCTTGGGACAGAGGTATCAATAC	5'		40
	gly_97	gly_73	AGAGGCCCTTGGGGAGGAGTA	3'		34
	gly_98	gly_74	TATGTAGATATAATTTAACGGTT	3'		34
	gly_99	gly_75	GAGGACAACCATGAGGATGAC	5'		33
	gly_100	gly_76	TGAACTGCAGGATTGATGGTTT	3'		32
	gly_101a-d	gly_77a-d	AAATTAGAAGATCAAATTGA	5'		28
	gly_103a,b	gly_78a,b	GCGTGCGAGGAGCCATGCATG	3'		22
	gly_105	gly_79	AGTTGATGATAATAAATGAA	5'		22
	gly_106	gly_80	GGGTAGTCCTGAGACCACATGA	5'		22
	gly_107	gly_81	TTTTAAGACGGTTGTTAGCTAA	5'		22
	gly_108a,h	gly_82a-h	AGATATTGAGCTGGTAGATGAG	3'		21
	gly_109	gly_83	TAAAGGACAAATAGTTAAGAAA	3'		21
	gly_110	gly_84	AGGTAAAATGAATTGAGTTTC	5'		21
	gly_111	gly_85	AGGCTGATAGTTCAACAAGGCAA	5'		21

## Sheet: Additional file 7
	Table S8. Prediction of target genes and their putative functions for the known and novel miRNAs.
	Name	Target gene	Function
	gma-miR166a,b	Glyma15g13640	Class III HD-Zip Protein
		Glyma11g20520	Class III HD-Zip Protein
		Glyma05g30000	Class III HD-Zip Protein
		Glyma03g12130	Metal Dependent Hydrolase - Related
	gma-miR482	Glyma05g05740	No Annotations
		Glyma05g05740	No Annotations
	gma-miR1520b	Glyma03g31570	Lipase (Class 3)
		Glyma01g35230	No Annotations
		Glyma13g37690	Vacuolar Sorting Protein PEP3/VPS18
		Glyma11g34580	Oligopeptide Transporter-Related
		Glyma04g09350	Tubulin C-Terminal Domain
	gma-miR390a-3p	Glyma13g43310	AUX/IAA Family
		Glyma13g19130	Glutathione S-Transferase
		Glyma04g20330	Leucine Rich Repeat Proteins, F-Box
	gma-miR1510a	Glyma18g40590	Short-Chain Dehydrogenases/Reductase
		Glyma04g39740	TIR Domain
		Glyma19g07680	TIR Domain
		Glyma16g22620	TIR Domain
		Glyma08g43880	Plant Transposase (Ptta/En/Spm Family)
		Glyma03g09410	No Annotations
	gma-miR167c	Glyma06g36670	No Annotations
		Glyma02g05030	Protein Phosphatase 2C
		Glyma04g10970	No Annotations
		Glyma04g10970	No Annotations
	gma-miR1512	Glyma08g25390	Zinc Finger, C3HC4 Type (RING Finger)
		Glyma15g32010	Zinc Finger, C3HC4 Type (RING Finger)
		Glyma15g01650	CASC3/Barentsz Eif4aiii Binding
		Glyma04g39820	Serine-Threonine Protein Kinase, Plant-Type
	gma-miR167e,f	Glyma06g36670	No Annotations
		Glyma04g10970	No Annotations
		Glyma01g43960	Dead Box Atp-Dependent Rna Helicase
		Glyma04g10970	No Annotations
	gma-miR167a,b,d	Glyma06g36670	No Annotations
		Glyma04g10970	No Annotations
		Glyma01g43960	Dead Box Atp-Dependent Rna Helicase
		Glyma04g10970	No Annotations
	gma-miR168	Glyma10g18090	No Annotations
		Glyma10g30650	Synovial Sarcoma Associated SS18 Protein
		Glyma11g04200	Serine-Threonine Protein Kinase, Plant-Type
	gma-miR1510b	Glyma19g07680	Leucine-Rich Repeat-Containing Protein
		Glyma16g25040	Leucine-Rich Repeat-Containing Protein
		Glyma13g26230	Leucine-Rich Repeat-Containing Protein
		Glyma16g22620	TIR Domain NB-ARC Domain
		Glyma18g47960	Short-Chain Dehydrogenases/Reductase
		Glyma08g19950	No Functional Annotations
	gma-miR2107	Glyma03g34250	No Functional Annotations
		Glyma13g32330	No Functional Annotations
	gma-miR398a,b	Glyma06g19680	Regulatory Protein MLP And Related LIM Proteins
		Glyma03g40280	Cu/Zn Superoxide Dismutase
		Glyma13g41270	No Functional Annotations
	gma-miR1515	Glyma02g08110	Aquaporin (Major Intrinsic Protein Family)
	gma-miR172a,b	Glyma15g04930	AP2 Domain
		Glyma12g07800	AP2 Domain
		Glyma11g15650	AP2 Domain
		Glyma19g36200	AP2 Domain
		Glyma11g05720	AP2 Domain
		Glyma01g39520	AP2 Domain
		Glyma17g18640	AP2 Domain
		Glyma05g18170	AP2 Domain
	gma-miR390a-5p	Glyma20g38980	Serine-Threonine Protein Kinase, Plant-Type
		Glyma09g15450	Pathogenesis-Related Protein Bet V I Family
	gma-miR171b	Glyma07g02240	Photosystem I Subunit VI
	gma-miR1507a,b	Glyma05g09220	No Annotations
		Glyma13g44860	Zinc Finger, C3HC4 Type
	gma-miR1513	Glyma17g02100	F-Box Domain
		Glyma08g27820	F-Box Domain
		Glyma08g27950	F-Box Domain
	gma-miR396b,c	Glyma13g16920	QLQ And WRC Domain
		Glyma18g01000	Rubber Elongation Factor Protein (REF)
		Glyma13g12120	Malic Enzyme-Related
		Glyma12g30730	Stress Responsive A/B Barrel Domain
		Glyma12g30730	Stress Responsive A/B Barrel Domain
	gma-miR390b	Glyma20g38980	Serine-Threonine Protein Kinase, Plant-Type
		Glyma06g47600	F-Box/Leucine Rich Repeat Protein
		Glyma04g13930	F-Box/Leucine Rich Repeat Protein
	gma-miR396a	Glyma15g19460	QLQ And WRC Domain
		Glyma06g13960	QLQ And WRC Domain
		Glyma13g16920	QLQ And WRC Domain
		Glyma03g35010	QLQ And WRC Domain
		Glyma11g01060	QLQ And WRC Domain
		Glyma07g04290	QLQ And WRC Domain
		Glyma19g37740	QLQ And WRC Domain
		Glyma17g05800	WRC Domain
	gma-miR1535	No found
	gma-miR164	Glyma08g18470	No Apical Meristem (NAM) Protein
		Glyma13g34950	No Apical Meristem (NAM) Protein
		Glyma05g00930	No Apical Meristem (NAM) Protein
		Glyma06g21020	No Apical Meristem (NAM) Protein
		Glyma04g33270	No Apical Meristem (NAM) Protein
		Glyma15g40510	No Apical Meristem (NAM) Protein
	gma-miR162	Glyma07g06580	Ribosomal Protein L5-Related
		Glyma07g06590	Ribosomal Protein L5-Related
		Glyma13g21200	Polyglutamine Binding Protein 1/Marvel Domain Containing 3
		Glyma10g42580	ACT Domain
	gma-miR159c	Glyma13g04030	MYB-Like DNA-Binding Domain
		Glyma19g29990	Engulfment And Cell Motility
	gma-miR159b	Glyma13g04030	Myb-Like DNA-Binding Domain
	gma-miR169c	Glyma09g07960	Transcription Factor Nf-Y Alpha-Related
		Glyma12g03750	High-Affinity Nickel-Transport Protein
	gma-miR319a,b	Glyma13g04030	Myb-Like DNA-Binding Domain
	gma-miR1517	No found
	gma-miR1520c	Glyma03g31570	Triacylglycerol Lipase Activity
		Glyma01g35230	No Annotations
	gma-miR160	Glyma13g40030	Auxin Response Factor
		Glyma12g08110	Auxin Response Factor
		Glyma04g43350	Auxin Response Factor
	gma-miR169b	Glyma13g16770	CCAAT-Binding Transcription Factor (CBF-B/NF-YA) Subunit B
		Glyma09g07960	CCAAT-Binding Transcription Factor (CBF-B/NF-YA) Subunit B
		Glyma19g38800	CCAAT-Binding Transcription Factor (CBF-B/NF-YA) Subunit B
		Glyma02g35190	CCAAT-Binding Transcription Factor (CBF-B/NF-YA) Subunit B
		Glyma13g27230	CCAAT-Binding Transcription Factor (CBF-B/NF-YA) Subunit B
		Glyma12g36540	CCAAT-Binding Transcription Factor (CBF-B/NF-YA) Subunit B
		Glyma07g04050	CCAAT-Binding Transcription Factor (CBF-B/NF-YA) Subunit B
		Glyma08g42240	Cdc2-Related Kinase
		Glyma08g04770	Subfamily Not Named
		Glyma05g34960	Subfamily Not Named
		Glyma14g01080	Pentatricopeptide Repeat-Containing Protein
	gma-miR1523	Glyma10g40560	No Annotations
		Glyma18g13200	No Annotations
		Glyma09g31840	Cytochrome P450 CYP2 Subfamily
	gma-miR1521	Glyma19g44280	Predicted UDP-Galactose Transporter
		Glyma05g01090	No Annotations
		Glyma05g22440	Adenosine 5'-Phosphosulfate Kinase
	gma-miR1519	Glyma16g18450	Predicted Ubiquitin Regulatory Protein, Contains UAS And UBX Domains
		Glyma13g36030	Auxin Responsive GH3 Gene Family
		Glyma17g00910	Acetyl-Coa C-Acetyltransferase
	gma-miR159a	Glyma20g35390	No Annotations
		Glyma13g34710	No Annotations
		Glyma19g40720	Anion Exchange Protein
		Glyma04g10930	Plant Organelle RNA Recognition Domain
		Glyma06g36770	Ankyrin Repeat-Containing
		Glyma02g45570	No Annotations
		Glyma13g04030	Transcription Factor, Myb Superfamily
	gma-miR2119	Glyma03g19010	Pentatricopeptide Repeat-Containing Protein
		Glyma16g34220	Synaptic Vesicle Transporter SVOP And Related Transporters (Major Facilitator Superfamily
		Glyma06g30350	Methyl-Cpg Binding Domain
		Glyma13g15790	Zinc Finger Cchc Domain Containing Protein
		Glyma12g30440	Cdc2-Related Kinase
		Glyma02g29380	Type III Restriction Enzyme, Res Subunit
	gma-miR156c,d,e	Glyma06g17700	SBP Domain
		Glyma19g32800	SBP Domain
		Glyma05g38180	SBP Domain
		Glyma03g27200	SBP Domain
		Glyma02g13370	SBP Domain
		Glyma06g36140	SBP Domain
		Glyma05g00200	SBP Domain
		Glyma16g05900	SBP Domain
		Glyma03g27200	SBP Domain
		Glyma13g37130	SBP Domain
		Glyma06g17700	SBP Domain
		Glyma15g13370	Tubulin-Specific Chaperone E
		Glyma13g18510	Cation-Transporting Atpase
		Glyma09g13540	Serine-Threonine Protein Kinase, Plant-Type
		Glyma15g26330	Serine-Threonine Protein Kinase, Plant-Type
		Glyma17g01000	Isp4 Like Protein
		Glyma17g01000	Isp4 Like Protein
		Glyma09g31220	Reticulon/Nogo
	gma-miR1511	TC387455	Glutamine Amidotransferase Class-I
	gma-miR1514b	Glyma05g27540	No Annotations
		Glyma08g02210	NADPH Oxidase
		Glyma20g35150	Zinc Finger, C3HC4 Type (RING Finger)
		Glyma06g20160	Pentatricopeptide Repeat-Containing Protein
	gma-miR1518	Glyma05g08670	Universal Stress Protein Family
		Glyma10g34500	No Annotations
		Glyma15g18700	Protein Kinase Domain
		Glyma14g22830	No Annotations
		Glyma07g02660	Protein Tyrosine Kinase
		Glyma14g22840	Phosphatidylinositol-4-Phosphate 5-Kinase Related
		Glyma02g05880	Putative Lysophospholipase
	gma-miR169a	Glyma13g16770	CCAAT-Binding Transcription Factor (CBF-B/NF-YA) Subunit B
		Glyma09g07960	CCAAT-Binding Transcription Factor (CBF-B/NF-YA) Subunit B
		Glyma19g38800	CCAAT-Binding Transcription Factor (CBF-B/NF-YA) Subunit B
		Glyma02g35190	CCAAT-Binding Transcription Factor (CBF-B/NF-YA) Subunit B
		Glyma13g27230	CCAAT-Binding Transcription Factor (CBF-B/NF-YA) Subunit B
		Glyma12g36540	CCAAT-Binding Transcription Factor (CBF-B/NF-YA) Subunit B
		Glyma07g04050	CCAAT-Binding Transcription Factor (CBF-B/NF-YA) Subunit B
		Glyma08g42240	CDC2-Related Kinase
		Glyma08g04770	Subfamily Not Named
		Glyma05g34960	Subfamily Not Named
		Glyma14g01080	Pentatricopeptide Repeat-Containing Protein
	gma-miR1536	Glyma12g08570	No Annotations
		Glyma04g41150	RNA Recognition Motif
		Glyma06g14540	Zinc-Binding Dehydrogenase
		Glyma12g00410	CRAL/TRIO, N-Terminus
		Glyma01g02850	GDP-Fucose Protein O-Fucosyltransferase
	gma-miR2109	Glyma16g10340	Leucine Rich Repeat
		Glyma16g34090	Leucine Rich Repeat
		Glyma16g27560	Leucine Rich Repeat
		Glyma14g04170	No Annotations
	gma-miR1520d	Glyma15g11350	DER1-Like Family
	gma-miR1514a	Glyma05g27540	No Annotations
		Glyma08g02210	NADPH Oxidase
		Glyma20g35150	Zinc Finger, C3HC4 Type (RING Finger)
		Glyma06g20160	Pentatricopeptide Repeat-Containing Protein
	gma-miR156a	Glyma06g17700	SBP Domain
		Glyma19g32800	SBP Domain
		Glyma05g38180	SBP Domain
		Glyma03g27200	SBP Domain
		Glyma02g13370	SBP Domain
		Glyma06g36140	SBP Domain
		Glyma05g00200	SBP Domain
		Glyma16g05900	SBP Domain
		Glyma03g27200	SBP Domain
		Glyma13g37130	SBP Domain
		Glyma06g17700	SBP Domain
		Glyma15g13370	Tubulin-Specific Chaperone E
		Glyma13g18510	Cation-Transporting Atpase
		Glyma09g13540	Serine-Threonine Protein Kinase, Plant-Type
		Glyma15g26330	Serine-Threonine Protein Kinase, Plant-Type
		Glyma17g01000	Isp4 Like Protein
		Glyma17g01000	Isp4 Like Protein
		Glyma09g31220	Reticulon/Nogo
	gma-miR1520a	Glyma06g20060	Vitamin-D-Receptor Interacting Mediator Subunit 17t
		Glyma03g31570	Triacylglycerol Lipase Activity
	gma-miR393	Glyma19g27280	AFB2 Like Protein
		Glyma16g05500	AFB2 Like Protein
		Glyma16g26200	AFB2 Like Protein
		Glyma02g07240	AFB2 Like Protein
		Glyma19g39420	TIR1 Like Protein
	gma-miR1508a	Glyma06g04740	Gibberellin Regulated Protein
		Glyma10g03840	Linker Histone H1 And H5 Family
		Glyma15g02010	H+/Oligopeptide Symporter
		Glyma06g46930	Transcription Elongation Factor SPT6
	gma-miR1509b	Glyma18g03980	No Annotations
		Glyma15g10020	No Annotations
		Glyma04g05790	Predicted Mechanosensitive Ion Channel
		Glyma14g08500	Alkaline Ceramidase-Related
	gma-miR172d,e	Glyma12g07800	AP2 Domain
	gma-miR172c	Glyma19g36200	AP2 Domain
		Glyma11g05720	AP2 Domain
		Glyma12g07800	AP2 Domain
	gma-miR1509a	Glyma18g03980	No Annotations
		Glyma15g10020	No Annotations
		Glyma04g05790	Predicted Mechanosensitive Ion Channel
		Glyma14g08500	Alkaline Ceramidase-Related
	gma-miR171a	Glyma01g18100	GRAS Family Transcription Factor
		Glyma10g40780	Serine/Threonine Protein Kinase
		Glyma10g40780	Serine/Threonine Protein Kinase
		Glyma20g26510	Serine/Threonine Protein Kinase
		Glyma20g26510	Serine/Threonine Protein Kinase
	gma-miR1527	Glyma08g22200	Cyclin, C-Terminal Domain
		Glyma06g06700	CCR4-NOT Transcription Complex Subunit 7/8
		Glyma03g05630	Prenylated Rab Acceptor 1-Related
		Glyma04g06620	CAF1 Family Ribonuclease
		Glyma19g39950	Alpha/Beta Hydrolase Fold
		Glyma09g15820	Serine/Arginine Rich Splicing Factor
	gma-miR2108a	Glyma05g11630	Elongation Factor Tu GTP Binding Domain
		Glyma17g23900	Elongation Factor Tu GTP Binding Domain
		Glyma18g01860	Core Histone H2A/H2B/H3/H4
		Glyma15g14220	CRAL/TRIO, N-Terminus
		Glyma07g09750	Predicted Gtpase-Activating Protein
		Glyma16g17190	Pectin Acetylesterase And Similar Proteins
	gma-miR2108b	Glyma05g11630	Elongation Factor Tu GTP Binding Domain
		Glyma17g23900	Elongation Factor Tu GTP Binding Domain
		Glyma18g01860	Core Histone H2A/H2B/H3/H4
		Glyma15g14220	CRAL/TRIO, N-Terminus
		Glyma07g09750	Predicted Gtpase-Activating Protein
		Glyma16g17190	Pectin Acetylesterase And Similar Proteins
	gma-miR1529	Glyma13g42410	Calcineurin-Like Phosphoesterase
		Glyma01g26950	Tubulin/Ftsz Family, Gtpase Domain
		Glyma04g06120	No Annotations
	gma-miR1532	Glyma16g12800	No Annotations
	gma-miR1528	Glyma19g22440	Conserved Phosducin-Like Protein
	gma-miR1516	Glyma03g32940	Major Facilitator Superfamily
		Glyma13g41780	Predicted Oxidoreductase
	miR4387e	Glyma03g07900	Methyltransferase Domain
		Glyma12g09490	Myb-Like DNA-Binding Domain
		Glyma11g18990	Myb-Like DNA-Binding Domain
		Glyma14g40500	Possible Lysine Decarboxylase
		Glyma17g37660	Possible Lysine Decarboxylase
	miR1512c	Glyma10g21350	Villin
		Glyma12g08490	Putative Methyltransferase
		Glyma02g06590	Polyprenyl Synthetase
	miR5667	Glyma03g34490	Glucosyl/Glucuronosyl Transferases
		Glyma19g41540	Nad Dependent Epimerase/Dehydratase
		Glyma03g41160	Exportin 4,7-Related
		Glyma10g10310	ML Domain
		Glyma04g06620	Ccr4-Associated Factor
		Glyma06g06700	Ccr4-Associated Factor
	miR5671	Glyma02g07180	Chlorophyll A/B Binding Protein
		Glyma10g37020	Elongation Factor Tu GTP Binding Domain
		Glyma17g14750	Glycosyl Hydrolases Family 32 N-Terminal Domain
		Glyma08g20700	Ca2+/Calmodulin-Dependent Protein Phosphatase (Calcineurin Subunit B), EF-Hand Superfamily Protein
		Glyma02g41920	Adaptor Protein Enigma And Related PDZ-LIM Proteins
		Glyma03g15800	Multicopper Oxidase
	miR5036	Glyma04g12480	No Annotations
		Glyma05g35120	NoAnnotations
		Glyma12g12800	Putative Lysophospholipase
		Glyma02g06360	Putative Methyltransferase
		Glyma17g13120	Integral To Membrane
		Glyma20g02120	Mitochondrial Import Inner Membrane Translocase, Subunit TIM17
	gly_1	Glyma06g02970	B-Box Zinc Finger
		Glyma17g37430	B-Box Zinc Finger
		Glyma04g03110	Thioredoxin-Related
		Glyma15g06000	Glucosyl/Glucuronosyl Transferases
	gly_2	Glyma20g20300	Serine-Threonine Protein Kinase
		Glyma07G08250	Fast Leu-Rich Domain-Comtaining
		Glyma02g09120	Zinc-Finger Rna-Binging
		Glyma01g18100	GRAS
	gly_3	Glyma09g37130	Lipoate-Protein Ligase
		Glyma10g20570	Magnesium Chelatase Subunit H
		Glyma15g37710	DNA-Directed Rna Polymerase
		Glyma16g27790	PPR Repeat Pentatricopeptide Repeat-Containing Protein
		Glyma18g10080	SAM Dependent Carboxyl Methyltransferase
		Glyma06g21080	Parvulin-Like Peptidyl-Prolyl Cis-Trans Isomerase
		Glyma04g33180	Parvulin-Like Peptidyl-Prolyl Cis-Trans Isomerase
		Glyma18g08630	DeEKProtein
		Glyma11g03670	Sybindin-Like Family
		Glyma03g24060	Zinc-Binding Dehydrogenase Alcohol Dehydrogenase Related
		Glyma13g00520	CCT Motif
		Glyma17g06660	Annotation Not Available
	gly_4	No found
	gly_5a,b	Glyma13g24110	Peroxidase
		Glyma10g34820	Drug Transporter-Related
		Glyma04g06590	Catenin And Plakophilin
	gly_6	Glyma15g07830	There Are No Functional Annotations For This Locus
		Glyma02g05090	Lupus La Ribonucleoprotein
		Glyma16g23170	Lupus La Ribonucleoprotein
		Glyma11g21130	Plant Calmodulin-Binding Domain
		Glyma04g27810	Plant Calmodulin-Binding Domain
	gly_7	Glyma19g45260	K+ Potassium Transporter
		Glyma03g42480	K+ Potassium Transporter
		Glyma07g04750	K+ Potassium Transporter
		Glyma06g14500	There Are No Functional Annotations For This Locus
		Glyma04g40290	There Are No Functional Annotations For This Locus
		Glyma11g20930	There Are No Functional Annotations For This Locus
		Glyma04g26230	There Are No Functional Annotations For This Locus
		Glyma10g05580	60s Ribosomal Protein L4
		Glyma13g19930	60s Ribosomal Protein L4
		Glyma13g17290	Beta-Ketoacyl Synthase, N-Terminal Domain
		Glyma17g05200	Beta-Ketoacyl Synthase, N-Terminal Domain
	gly_8	No found
	gly_9	No found
	gly_10	Glyma08g03940	Major Facilitator Superfamily
		Glyma05g35710	Major Facilitator Superfamily
		Glyma04g00730	There Are No Functional Annotations For This Locus
		Glyma18g37410	There Are No Functional Annotations For This Locus
		Glyma04g43550	POT Family
		Glyma07g40110	Protein Tyrosine Kinase
		Glyma14g08500	Alkaline Ceramidase-Related
		Glyma09g18850	Multidrug Resistance Pump
		Glyma09g37070	RNA-Binding Protein Related
		Glyma18g49600	RNA-Binding Protein Related
	gly_11a,b,c	Glyma05g02970	Ribosomal Protein S21
		Glyma08g11770	Ubiquitin-Like Protein Sumo/Smt3-Related
		Glyma17g07720	There Are No Functional Annotations For This Locus
		Glyma14g34710	Drug Transporter-Related
		Glyma04g10340	Subfamily Not Named
		Glyma13g17650	CREG1 Protein
		Glyma17g04840	CREG1 Protein
		Glyma12g28760	PB1 Domain
		Glyma05g03120	Adenylate Kinase
		Glyma17g13750	CDC2-Related Kinase
		Glyma14g17380	26 Proteasome Complex Subunit Dss1
		Glyma17g29330	26 Proteasome Complex Subunit Dss1
		Glyma06g19530	26 Proteasome Complex Subunit Dss1
		Glyma16g05560	Nitrate, Fromate, Iron Dehydrogenase
		Glyma05g03120	Adenylate Kinase
		Glyma02g24930	Adenylate Kinase
		Glyma17g13760	Adenylate Kinase
	gly_12	Glyma09g30540	Aldose-1-Epimerase
		Glyma07g11600	Aldose-1-Epimerase
		Glyma19g36510	Mahogunin
		Glyma02g33780	Glutathione S-Transferase, Gst, Superfamily, Gst Domain Containing
	gly_13a-o	Glyma15g06020	Phospho-2-Dehydro-3-Deoxyheptonate Aldolase 1, 2
		Glyma18g09000	Atp-Binding Cassette Transporter
		Glyma08g43810	Atp-Binding Cassette Transporter
		Glyma06g06990	Cysteinyl-Trna Synthetase
		Glyma04g06910	Cysteinyl-Trna Synthetase
	miR397b-3p	Glyma02g31110	There Are No Functional Annotations For This Locus
		Glyma07g33860	RNA Recognition Motif. (A.K.A. Rrm, Rbd, Or Rnp Domain)
		Glyma02g11580	RNA Recognition Motif. (A.K.A. Rrm, Rbd, Or Rnp Domain）
		Glyma06g39760	Diacylglycerol Kinase Accessory Domain
		Glyma12g22280	Diacylglycerol Kinase Accessory Domain
		Glyma18g01890	Lanc-Like Protein
		Glyma11g37990	Lanc-Like Protein
	gly_15	Glyma11g30040	Calcium/Calmodulin-Dependent Protein Kinase-Related
		Glyma04g07460	WD40 Repeat Protein
		Glyma10g35230	RAS-Related Gtpase
		Glyma14g05240	Serine-Threonine Protein Kinase, Plant-Type
	gly_16	Glyma08g46610	Fe(II)/ Ascorbate Oxidase Superfamily
		Glyma19g01090	Gdsl-Like Lipase/Acylhydrolase
		Glyma11g06330	Alpha/Beta Hydrolase Related
		Glyma10g38750	Mediator Of RNA Polymerase II Transcription Subunit (SOH1)
		Glyma11g03940	Serine-Threonine Protein Kinase, Plant-Type
		Glyma04g05340	NADH Dehydrogenase
		Glyma14g05580	ELAC Related
	gly_17	No found
	gly_18	Glyma06g03910	Small Seven Transmembrane Domain-Containing Protein
		Glyma13g01040	Porin/Voltage-Dependent Anion-Selective Channel Protein
		Glyma05g08450	CCCH-Type Zn-Finger Protein
		Glyma05g05670	60s Ribosomal Protein L37a
	gly_19	Glyma11g14190	Gtpase Of Unknown Function; Miro-Like Protein
		Glyma19g39740	NOT56 - Related
		Glyma03g37130	NOT56 - Related
		Glyma13g01040	Voltage-Dependent Anion-Selective Channel
		Glyma17g07140	Voltage-Dependent Anion-Selective Channel
		Glyma03g40600	Trna Pseudouridine Synthase D
		Glyma19g43270	Trna Pseudouridine Synthase D
		Glyma17g01820	Protein Of Unknown Function (Duf1084)
		Glyma02g06130	There Are No Functional Annotations For This Locus
		Glyma16g24890	There Are No Functional Annotations For This Locus
		Glyma20g27160	There Are No Functional Annotations For This Locus
		Glyma08g14920	Chaperone-Activity Of Bc1 Complex (Cabc1)-Related
		Glyma05g31670	Chaperone-Activity Of Bc1 Complex (Cabc1)-Related
		Glyma06g15070	Chaperone-Activity Of Bc1 Complex (Cabc1)-Related
	miR5037e	No found
	miR4416b	Glyma18g50650	Serine-Threonine Protein Kinase, Plant-Type
		Glyma18g50630	Serine-Threonine Protein Kinase, Plant-Type
		Glyma02g40180	There Are No Functional Annotations For This Locus
		Glyma09g33470	There Are No Functional Annotations For This Locus
	gly_20	Glyma13g00920	Vernalization-Insensitive Protein 3
		Glyma05g19580	Nicotinate Phosphoribosyltransferase
		Glyma08g24280	Predicted Dehydrogenase
		Glyma07g13780	Patatin-Like Phospholipase
		Glyma07g05390	Inorganic Pyrophosphatase/Nucleosome Remodeling Factor, Subunit Nurf38
		Glyma19g25900	RNA Binding/Translational Regulation Protein Of The Sua5 Family
		Glyma01g39790	Manganese Transporter
		Glyma02g05060	Aspartyl Proteases
		Glyma05g05260	Ras-Related Gtpase
		Glyma13g36690	Multifunctional Chaperone (14-3-3 Family)
		Glyma03g25740	Tryptophanyl-Trna Synthetase
		Glyma08g23960	Annotation Not Available
		Glyma06g37230	Annotation Not Available
	gly_21a-d	Glyma13g01750	Putative Methyltransferase; Methyltransferase Domain
		Glyma07g31680	Alkaline Ceramidase-Related
		Glyma13g24770	Protein Of Unknown Function (Duf616)
		Glyma14g05580	Elac Related
		Glyma02g43400	Elac Related
		Glyma08g06340	F-Box Domain
		Glyma07g30950	F-Box Domain
		Glyma13g25440	Leucine-Rich Repeat-Containing Protein
		Glyma06g16880	There Are No Functional Annotations For This Locus
		Glyma04g38170	There Are No Functional Annotations For This Locus
		Glyma11g33590	Diphosphoinositol Polyphosphate Phosphohydrolase
		Glyma18g04620	Diphosphoinositol Polyphosphate Phosphohydrolase
		Glyma14g08170	2-Hydroxyacid Dehydrogenase
		Glyma14g08180	Retinaldehyde Binding Protein-Related
	gly_22	Glyma19g10520	Serine-Threonine Protein Kinase, Plant-Type
		Glyma20g25570	Serine-Threonine Protein Kinase, Plant-Type
		Glyma10g41650	Serine-Threonine Protein Kinase, Plant-Type
		Glyma13g32680	Methionine Sulfoxide Reductase
		Glyma06g14660	Protein Of Unknown Function (Duf3133)
		Glyma04g41350	Immunoglobulin-Binding Protein 1-Related
		Glyma06g13500	Immunoglobulin-Binding Protein 1-Related
		Glyma07g15940	MYB-Like Dna-Binding Domain
		Glyma11g07820	MADS Box Protein
		Glyma07g33110	Kinesin Heavy Chain
		Glyma02g15340	Kinesin Heavy Chain
	miR1507d	Glyma09g12250	There Are No Functional Annotations For This Locus
		Glyma05g36330	Ectonucleotide Pyrophosphatase/Phosphodiesterase
		Glyma20g00980	Cytochrome P450
		Glyma15g26790	Serine-Threonine Protein Kinase, Plant-Type
	miR405b	Glyma10g28070	There Are No Functional Annotations For This Locus
		Glyma13g40550	Serine/Threonine Protein Kinase
	gly_23	Glyma10g04750	Myosin
		Glyma13g19080	Myosin
		Glyma16g22370	Serine-Threonine Protein Kinase, Plant-Type
		Glyma07g03210	Methyltransferase
		Glyma12g35840	Phosphoenolpyruvate Carboxylase
		Glyma13g34560	Phosphoenolpyruvate Carboxylase
		Glyma20g09810	Phosphoenolpyruvate Carboxylase
		Glyma06g33380	Phosphoenolpyruvate Carboxylase
		Glyma11g36570	There Are No Functional Annotations For This Locus
		Glyma18g00470	There Are No Functional Annotations For This Locus
		Glyma09g01440	Gras Family Transcription Factor
		Glyma15g12320	Gras Family Transcription Factor
		Glyma08g05120	Dynamin
		Glyma05g34540	Dynamin
	gly_24	Glyma09g34720	O-Linked N-Acetylglucosamine Transferase, Ogt
		Glyma01g35290	O-Linked N-Acetylglucosamine Transferase, Ogt
		Glyma03g17920	Serine Protease Family S10 Serine Carboxypeptidase
		Glyma17g21240	Leucine-Rich Repeat-Containing Protein
		Glyma05g17460	Leucine-Rich Repeat-Containing Protein
		Glyma06g23470	Hydrolase Activity, Hydrolyzing O-Glycosyl Compounds
		Glyma04g22190	Glycosyl Hydrolases Family 17; X8 Domain
	gly_25a-k	Glyma15g04970	V-Type Atpase 116kda Subunit Family
		Glyma03g33740	Wd Domain, G-Beta Repeat
		Glyma15g14970	Huntingtin Interacting Protein Hypk
		Glyma07g07350	Mechanosensitive Ion Channel
	miR5770a	Glyma01g07860	Copper Amine Oxidase
		Glyma17g02260	Copper Amine Oxidase
		Glyma01g35230	No Annotations
		Glyma03g00770	Drug Transporter Activity
	gly_26	Glyma07g33620	Carboxyl Transferase Domain
	gly_27	No found
	gly_28	Glyma14g37730	Udp-Glucuronosyl And Udp-Glucosyl Transferase
		Glyma07g16290	Zinc Finger, C2h2 Type
	gly_29	No found
	gly_30	Glyma17g33370	Protein Tyrosine Kinase
		Glyma08g03870	Pentatricopeptide Repeat-Containing Protein
	gly_31	Glyma04g04220	Zinc Finger, C3hc4 Type (Ring Finger)
	gly_14	Glyma05g30670	Annotation Not Available
	gly_32	Glyma13g24580	Mitochondrial Carrier Protein Related
		Glyma13g39790	ATP-Binding Transport Protein-Related
		Glyma17g06540	Nucleolar And Coiled-Body Phosphoprotein 1
		Glyma04g05250	Hemoglobinase Family Member
	gly_33a,b	Glyma13g38330	Translation Factor Sui1
	gly_34	Glyma05g17460	Leucine-Rich Repeat-Containing Protein
		Glyma05g17470	Leucine-Rich Repeat-Containing Protein
		Glyma06g16630	Poly(A) Polymerase Cid (Pap)-Related
		Glyma20g04520	Calmodulin
		Glyma08g43790	RNA-Binding Protein
	gly_35	Glyma03g33460	Ribosomal Protein
		Glyma18g08910	Serine Acetyltransferase, N-Terminal
		Glyma13g43930	Alpha/Beta Hydrolase Fold
		Glyma14g07440	RNA Recognition Motif
		Glyma02g41510	RNA Recognition Motif
		Glyma02g15500	Predicted Translation Initiation Factor Related To Eif-3a
	gly_36	Glyma04g04160	Defective Chloroplast And Leaves Protein
	gly_37a,b	Glyma08g05740	Eukaryotic Translation Initation Factor 3, Subunit 8 (Eif3s8)-Related
	gly_38	Glyma16g26580	Dead Box Atp-Dependent Rna Helicase
		Glyma18g02960	Clathrin Propeller Repeat
		Glyma09g02560	Glycolipid Transfer Protein (Gltp)
		Glyma02g17470	Universal Stress Protein Family
		Glyma02g04610	No Annotations
		Glyma07g36280	No Annotations
	gly_39	Glyma15g27590	No Annotations
		Glyma02g47160	No Annotations
	gly_40a-c	Glyma10g04070	Hr-Like Lesion-Inducing
		Glyma07g09880	Atp-Dependent Clp Protease Adaptor Protein Clps
		Glyma20g17040	Gb Def: At1g02120/T7i23_26
		Glyma16g05120	Zinc Ion Binding
		Glyma13g20250	Zinc Finger, C3hc4 Type (Ring Finger)
		Glyma05g35860	Ceramide Glucosyltransferase
		Glyma08g14940	No Annotations
	gly_41a,b	Glyma14g02230	Protease Inhibitor/Seed Storage/Ltp Family
	gly_42	Glyma06g02290	Pyridoxal-Dependent Decarboxylase, C-Terminal Sheet Domain
		Glyma08g04880	Plant Invertase/Pectin Methylesterase Inhibitor
		Glyma13g21210	FKBP-Type Peptidyl-Prolyl Cis-Trans Isomerase
		Glyma08g20020	Udp-Glucose:Glycoprotein Glucosyltransferase
		Glyma08g15890	2og-Fe(Ii) Oxygenase Superfamily
		Glyma13g00850	Homogenitisate Phytyltransferase
		Glyma13g43560	Kinesin-Like Protein
		Glyma19g33110	No Annotations
		Glyma05g08250	No Annotations
	gly_43	Glyma18g37410	No Annotations
		Glyma11g15680	Peroxidase
	gly_44a-h	Glyma10g03260	Conserved Wd40 Repeat-Containing Protein
		Glyma08g11460	Heat Shock Transcription Factor
		Glyma11g11250	Aig1 Family
		Glyma02g11900	Regulation Of Transcription, Dna-Dependent
		Glyma01g05680	Regulation Of Transcription, Dna-Dependent
	gly_45	Glyma07g37950	5'-Amp-Activated Protein Kinase, Gamma Subunit
		Glyma11g00740	Survival Protein Sure
		Glyma08g02540	No Annotations
	gly_46	Glyma11g18700	No Annotations
		Glyma15g03560	Protein Prenyltransferase Alpha Subunit Repeat
		Glyma17g01930	No Annotations
		Glyma14g10760	No Annotations
		Glyma18g51220	Amino Acid Transporter
		Glyma15g04300	Tim17/Tim22/Tim23 Family
		Glyma14g00640	Chlorophyll A-B Binding Protein
		Glyma20g24990	Ribosomal Protein L18e/L15
	gly_47	Glyma17g05420	No Annotations
		Glyma17g14420	No Annotations
		Glyma03g34240	Protein Phosphatase 2a Regulatory B Subunit (B56 Family)
	miR408a,c	Glyma04g42760	Aspartyl Protease
		Glyma04g42770	Aspartyl Protease
		Glyma06g11990	Aspartyl Protease
		Glyma20g30450	Glycosyl Hydrolases Family 18
	miR408e	Glyma01g29630	Fatty Acid Desaturase
	miR396l	Glyma11g02520	Protein Tyrosine Kinase
		Glyma11g36870	NnrU Protein
		Glyma20g32530	Cyclophilin Type Peptidyl-Prolyl Cis-Trans Isomerase
	miR172i,l	Glyma12g07800	PHAP2B Protein
	miR172h,g	Glyma12g34940	No Annotations
		Glyma10g08720	No Annotations
		Glyma01g39700	ARF-Related
		Glyma11g06830	Ubiquitin-Protein Ligase
		Glyma11g06830	Ubiquitin-Protein Ligase
		Glyma08g39880	Conserved Hypothetical Atp Binding Protein
		Glyma06g13450	ATP-Dependent Clp Protease Atp-Binding Subunit Clpx
		Glyma15g12600	Protease Inhibitor/Seed Storage/Ltp Family
	miR397c	Glyma11g36870	Nnru Protein
		Glyma20g32530	Cyclophilin Type Peptidyl-Prolyl Cis-Trans Isomerase
	miR2111b,c,f	Glyma19g01430	Eama-Like Transporter Family
		Glyma08g24800	No Annotations
		Glyma16g06160	Kelch-Related Proteins
		Glyma08g16190	Helix-Loop-Helix Dna-Binding Domain
	miR2111h,i,j	Glyma16g06160	Kelch Motif
		Glyma19g01430	Eama-Like Transporter Family
		Glyma08g24800	Protein Of Unknown Function (Duf3531)
		Glyma08g16190	Helix-Loop-Helix Dna-Binding Domain
		Glyma01g33730	Ribosomal Protein L19e
	miR5559	Glyma06g41110	Serine-Threonine Protein Kinase, Plant-Type
		Glyma13g25950	Leucine-Rich Repeat-Containing Protein
		Glyma12g35270	Ubiquitin-Conjugating Enzyme E2
		Glyma20g34670	Thioredoxin - Related
		Glyma16g08520	Tim17/Tim22/Tim23 Family
		Glyma08g09250	VQ Motif
		Glyma14g02030	Annotation Not Available
	miR5037c	No found
	miR862c	Glyma11g29280	Glutaredoxin
		Glyma02g43140	Glutaredoxin
		Glyma11g13670	Putative Transmembrane Protein Cmp44e
		Glyma04g36210	Protein Tyrosine Kinase
		Glyma04g39520	Proteasome Regulatory Subunits
		Glyma05g33880	Calmodulin And Related Proteins
		Glyma13g32010	Ribonucleoprotein
	miR862d	Glyma14g06220	Glutaredoxin-Related Protein
		Glyma18g02840	Glutaredoxin-Related Protein
		Glyma02g43140	Glutaredoxin And Related Proteins
		Glyma11g29280	Glutaredoxin And Related Proteins
		Glyma11g13670	Putative Transmembrane Protein Cmp44e
		Glyma04g39520	26s Proteasome Regulatory Complex, Subunit Rpn5/Psmd12
		Glyma05g33880	Calmodulin And Related Proteins (Ef-Hand Superfamily)
		Glyma13g32010	Ribonucleoprotein
	miR4416d	Glyma03g37830	No Annotations
		Glyma15g06650	Methionine Sulfoxide Reductase
	miR171p	Glyma01g18100	5'-Amp-Activated Protein Kinase , Beta Subunit
		Glyma11g33750	5'-Amp-Activated Protein Kinase , Beta Subunit
		Glyma11g17490	GRAS
		Glyma20g03210	Glycoside Hydrolases
	miR399i	Glyma12g03750	High-Affinity Nickel-Transport Protein
		Glyma18g36150	Annotation Not Available
	miR399j,k	Glyma10g04230	MFS Transporter, Phs Family, Inorganic Phosphate Transporter
		Glyma15g06550	DNA Polymerase Phi
		Glyma09g01080	Pap_Fibrillin
		Glyma05g29470	Heat Shock Transcription Factor
	miR171g,j,u	Glyma01g18100	GRAS Family Transcription Factor
		Glyma01g38360	GRAS Family Transcription Factor
	miR4416c	Glyma03g37830	No Annotations
		Glyma15g06650	Methionine Sulfoxide Reductase
	miR171o	Glyma01g18100	Gras Family Transcription Factor
		Glyma10g40780	Serine/Threonine Protein Kinase
		Glyma10g40780	Serine/Threonine Protein Kinase
		Glyma20g26510	Serine/Threonine Protein Kinase
		Glyma20g26510	Serine/Threonine Protein Kinase
	miR395b,c	Glyma18g02240	Sulfate Transporter Family
		Glyma06g11150	Sulfate Transporter Family
		Glyma20g28980	ATP Sulfurylase
		Glyma10g38760	ATP Sulfurylase
		Glyma15g41580	Cation Efflux Family
		Glyma18g03110	Phosphoinositide-Specific Phospholipase C
		Glyma14g07940	NAD Dependent Epimerase/Dehydratase Family
		Glyma10g38920	Proteins Containing Regions Of Low-Complexity
	miR156aa	Glyma06g17700	SBP domain
		Glyma19g32800	SBP domain
		Glyma05g38180	SBP domain
		Glyma03g27200	SBP domain
		Glyma02g13370	SBP domain
		Glyma06g36140	SBP domain
		Glyma05g00200	SBP domain
		Glyma16g05900	SBP domain
		Glyma03g27200	SBP domain
		Glyma13g37130	SBP domain
		Glyma06g17700	SBP domain
		Glyma15g13370	Tubulin-Specific Chaperone E
		Glyma13g18510	Cation-Transporting Atpase
		Glyma09g13540	Serine-Threonine Protein Kinase, Plant-Type
		Glyma15g26330	Serine-Threonine Protein Kinase, Plant-Type
		Glyma17g01000	Isp4 Like Protein
		Glyma17g01000	Isp4 Like Protein
		Glyma09g31220	Reticulon/Nogo
	miR171s,r	Glyma07g02240	Photosystem I Subunit Vi
	miR482f	Glyma10g30100	Guanyl-Nucleotide Exchange Factor
		Glyma18g20800	Copper Amine Oxidase
	miR164l	Glyma08g18470	No Apical Meristem (Nam) Protein
		Glyma17g10970	No Apical Meristem (Nam) Protein
		Glyma06g21020	No Apical Meristem (Nam) Protein
		Glyma15g40070	Cartenoid Oxygenase
		Glyma07g31840	40s Ribosomal Protein S6
	miR156r	Glyma06g17700	SBP domain
		Glyma19g32800	SBP domain
		Glyma05g38180	SBP domain
		Glyma03g27200	SBP domain
		Glyma02g13370	SBP domain
		Glyma06g36140	SBP domain
		Glyma05g00200	SBP domain
		Glyma16g05900	SBP domain
		Glyma03g27200	SBP domain
		Glyma13g37130	SBP domain
		Glyma06g17700	SBP domain
		Glyma15g13370	Tubulin-Specific Chaperone E
		Glyma13g18510	Cation-Transporting Atpase
		Glyma09g13540	Serine-Threonine Protein Kinase, Plant-Type
		Glyma15g26330	Serine-Threonine Protein Kinase, Plant-Type
		Glyma17g01000	Isp4 Like Protein
		Glyma17g01000	Isp4 Like Protein
		Glyma09g31220	Reticulon/Nogo
	miR156q,s	Glyma06g17700	SBP domain
		Glyma19g32800	SBP domain
		Glyma05g38180	SBP domain
		Glyma03g27200	SBP domain
		Glyma02g13370	SBP domain
		Glyma06g36140	SBP domain
		Glyma05g00200	SBP domain
		Glyma16g05900	SBP domain
		Glyma03g27200	SBP domain
		Glyma13g37130	SBP domain
		Glyma06g17700	SBP domain
		Glyma15g13370	Tubulin-Specific Chaperone E
		Glyma13g18510	Cation-Transporting Atpase
		Glyma09g13540	Serine-Threonine Protein Kinase, Plant-Type
		Glyma15g26330	Serine-Threonine Protein Kinase, Plant-Type
		Glyma17g01000	Isp4 Like Protein
		Glyma17g01000	Isp4 Like Protein
		Glyma09g31220	Reticulon/Nogo
	miR156ab-ag	Glyma06g17700	SBP domain
		Glyma19g32800	SBP domain
		Glyma05g38180	SBP domain
		Glyma03g27200	SBP domain
		Glyma02g13370	SBP domain
		Glyma06g36140	SBP domain
		Glyma05g00200	SBP domain
		Glyma16g05900	SBP domain
		Glyma03g27200	SBP domain
		Glyma13g37130	SBP domain
		Glyma06g17700	SBP domain
		Glyma15g13370	Tubulin-Specific Chaperone E
		Glyma13g18510	Cation-Transporting Atpase
		Glyma09g13540	Serine-Threonine Protein Kinase, Plant-Type
		Glyma15g26330	Serine-Threonine Protein Kinase, Plant-Type
		Glyma17g01000	Isp4 Like Protein
		Glyma17g01000	Isp4 Like Protein
		Glyma09g31220	Reticulon/Nogo
	miR166v,w	Glyma15g13640	Class Iii Hd-Zip Protein
		Glyma11g20520	Class Iii Hd-Zip Protein
		Glyma05g30000	Class Iii Hd-Zip Protein
		Glyma03g12130	Metal Dependent Hydrolase - Related
	miR393i	Glyma19g27280	AFB2 Like Protein
		Glyma16g05500	AFB2 Like Protein
		Glyma16g26200	AFB2 Like Protein
		Glyma02g07240	AFB2 Like Protein
		Glyma19g39420	TIR1 Like Protein
	miR1513e	Glyma08g10360	F-Box Domain
		Glyma08g27850	F-Box Domain
		Glyma04g32470	Mitochondrial Carrier Protein Related
		Glyma02g00220	Eukaryotic Translation Initiation Factor
	miR167k	Glyma14g03650	Auxin response factor AUX/IAA family B3 DNA binding domain
		Glyma15g09750	Auxin response factor AUX/IAA family B3 DNA binding domain
		Glyma05g27580	Auxin response factor AUX/IAA family B3 DNA binding domain
		Glyma13g29320	Auxin response factor AUX/IAA family B3 DNA binding domain
		Glyma02g40650	Auxin response factor AUX/IAA family B3 DNA binding domain
		Glyma11g31940	Auxin response factor AUX/IAA family B3 DNA binding domain
		Glyma15g00770	Cytoplasmic Zn-finger protein BRAP2 (BRCA1 associated protein)
	miR399e,f	Glyma09g01080	PAP_Fibrillin
		Glyma06g13320	Protein Kinase Pctaire And Related Kinases
		Glyma13g32760	Predicted Regulator Of Rrna Gene Transcription (Myb-Binding Protein)
	miR398d	Glyma06g19680	Regulatory Protein Mlp And Related Lim Proteins
		Glyma02g31270	Zinc Finger Protein
		Glyma06g28650	Plastocyanin-Like Domain
		Glyma03g40280	Cu2+/Zn2+ Superoxide Dismutase Sod1
		Glyma13g41270	No Annotations
	miR169t	Glyma19g38800	Transcription Factor Nf-Y Alpha2-Related
		Glyma09g07960	Transcription Factor Nf-Y Alpha2-Related
		Glyma02g35190	Transcription Factor Nf-Y Alpha2-Related
		Glyma07g04050	Transcription Factor Nf-Y Alpha2-Related
		Glyma13g27230	Transcription Factor Nf-Y Alpha2-Related
		Glyma13g07320	Fe(II)/ Ascorbate Oxidase Superfamily
		Glyma20g27860	Hypothetical Protein
	miR167i	Glyma02g05030	Protein Phosphatase 2C
		Glyma04g10970	No Annotations
		Glyma06g36670	No Annotations
		Glyma04g10970	No Annotations
	miR399n,o	Glyma10g04230	MFS Transporter, Phs Family, Inorganic Phosphate Transporter
		Glyma15g06550	DNA Polymerase Phi
		Glyma09g01080	PAP_Fibrillin
		Glyma05g29470	Heat Shock Transcription Factor
	miR408e	Glyma01g29630	Fatty Acid Desaturase
	miR1520s	Glyma01g40620	MYC
		Glyma19g38990	Downstream Neighbor Of SON
		Glyma16g27990	Chlorophyll A/B Binding Protein
		Glyma11g34270	Short Chain Dehydrogenase
		Glyma02g13730	Sugar Transporter
		Glyma13g40380	Carbamoyl-Phosphate Synthase Large Subunit
		Glyma10g32320	ER Degradation Enhancer, Mannosidase Alpha-Like 2
		Glyma16g00490	YT521-B-Like Family
	miR169s	Glyma13g16770	CCAAT-binding transcription factor (CBF-B/NF-YA) subunit B
		Glyma09g07960	CCAAT-binding transcription factor (CBF-B/NF-YA) subunit B
		Glyma19g38800	CCAAT-binding transcription factor (CBF-B/NF-YA) subunit B
		Glyma02g35190	CCAAT-binding transcription factor (CBF-B/NF-YA) subunit B
		Glyma13g27230	CCAAT-binding transcription factor (CBF-B/NF-YA) subunit B
		Glyma12g36540	CCAAT-binding transcription factor (CBF-B/NF-YA) subunit B
		Glyma07g04050	CCAAT-binding transcription factor (CBF-B/NF-YA) subunit B
		Glyma08g42240	CDC2-Related Kinase
		Glyma08g04770	Subfamily Not Named
		Glyma05g34960	Subfamily Not Named
		Glyma14g01080	Pentatricopeptide Repeat-Containing Protein
	miR4357b,c	Glyma13g35180	Glycosyltransferase 14 Family Member
