# Supplementary material for: Identification and Dynamic Regulation of microRNAs Involved in Salt Stress Responses in Functional Soybean Nodules by High-Throughput Sequencing
Source: Int J Mol Sci. 2013 Jan 28;14(2):2717–38. doi: 10.3390/ijms14022717 (PMC3588011; doi:10.3390/ijms14022717)
Supplement: Supplementary File 10 — Supplementary Table 9 (XLS, 20 KB) [file ijms-14-02717-s010.xls]

## Sheet: Sheet1
	Table S9. Primer sequences for real-time PCR and 5'RACE.
	Primer	Sequence
	gly_1RT-Forward Primer	GGGCTCCTCTCTCCTGGCATG
	gly_3RT-Forward Primer	TTAGCTTCTTTCACCTTTCCC
	gly_37RT-Forward Primer	GCGTATGAGGAGTCATGCA
	miR862cRT-Forward Primer	GCTGGATGTCTTTGAAGGA
	miR171pRT-Forward Primer	TTGAGCCGCGTCAATATCT
	miR2111bcfgRT-Forward Primer	TAATCTGCATCCTGAGGTTT
	miR169tRT-Forward Primer	TAGCCAAGGATGGACTTGCCTA
	miR4416dRT-RT-Forward Primer	ACGGGTCGCTCTCACCT
	5.8srRNART-RT-Forward Primer	ACGCCTGCCTGGGTGTCACAC
	RT-Reverse Primer	GCGAGCACAGAATTAATACGACT
	GeneRace 5' Primer	CGACTGGAGCACGAGGACACTGA
	GeneRace 5' Nested Primer	GGACACTGACATGGACTGAAGGAGTA
	Gm04g05250GSP	ATCATGAGCAGAGAGTACAGTCCAT
	Gm04g05250GSP-Next	TTGCAAAGGACCTCATATGTTTCATCC
	Gm19g27280GPS	GCAAGGAAGTTACAAAACACTACACCCG
	Gm19g27280GPS-Nest	CAGAGTCCATACATATTCTGGTGC
	Gm19g39420GPS	TCCACAGCGTGATCACTCAAGCC
	Gm19g39420GPS-Nest	TTCCATTGTCCACACAAAACCAGG
	Gm11g17490GPS	GGCCAGGAAGCAGAATTTAAAGAC
	Gm11g17490GPS-Nest	GTGGGTGAAAAGGTGAAAGAACTG
